# Supplementary material for: Early diagnosis and better rhythm management to improve outcomes in patients with atrial fibrillation: the 8th AFNET/EHRA consensus conference
Source: PubMed Central journal article supplement — Europace. 2022 Jul 27;25(1):6–27. doi: 10.1093/europace/euac062 (PMC9907557; doi:10.1093/europace/euac062), 2022-07-27
Supplement: euac062_supplementary_data.pdf [file euac062_supplementary_data.pdf]

## Conflicts of Interest

I hereby declare that I have no pecuniary or other personal interest, direct or indirect, in any matter that raises or may raise a conflict with my co-authorship of the manuscript "Early Diagnosis and Better Rhythm Management to improve outcomes in patients with Atrial Fibrillation: The 8th AFNET/EHRA Consensus Conference"

I hereby declare the following pecuniary or other personal interests, direct or indirect, which raise or may raise a conflict with my co-authorship of the manuscript "Early Diagnosis and Better Rhythm Management to improve outcomes in patients with Atrial Fibrillation: The 8th AFNET/EHRA Consensus Conference"

These interests are stated below :

Ownership / Employee: \_\_\_ Employee of a pharmaceutical company producing and marketing an oral anticoagulant (edoxaban) \_\_\_\_\_

\_\_\_\_\_

\_\_\_\_\_

Consulting Fees / Honoraria: \_\_\_\_\_

\_\_\_\_\_

\_\_\_\_\_

Research Grants: \_\_\_\_\_

\_\_\_\_\_

\_\_\_\_\_

Affiliation (please add your name and affiliation as it should appear on the paper): \_\_\_\_\_

Elena Andreassi Marinelli MD,

Daiichi Sankyo Europe GmbH \_\_\_\_\_

10-12-2021 \_\_\_\_\_ Elena Andreassi Marinelli

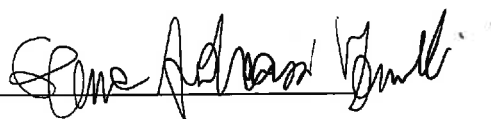

Date

Name

Signature

Elena Andreassi Marinelli

## Conflicts of Interest

I hereby declare that I have no pecuniary or other personal interest, direct or indirect, in any matter that raises or may raise a conflict with my co-authorship of the manuscript "Early Diagnosis and Better Rhythm Management to improve outcomes in patients with Atrial Fibrillation: The 8th AFNET/EHRA Consensus Conference"

I hereby declare the following pecuniary or other personal interests, direct or indirect, which raise or may raise a conflict with my co-authorship of the manuscript "Early Diagnosis and Better Rhythm Management to improve outcomes in patients with Atrial Fibrillation: The 8th AFNET/EHRA Consensus Conference"

These interests are stated below:

Ownership / Employee: \_\_\_\_\_

\_\_\_\_\_  
\_\_\_\_\_

Consulting Fees / Honoraria: Consulting / Speaker fees for Biosense Webster

\_\_\_\_\_  
\_\_\_\_\_

Research Grants: \_\_\_\_\_

\_\_\_\_\_  
\_\_\_\_\_

**Affiliation (please add your name and affiliation as it should appear on the paper):**

1. Arrhythmia Section, Cardiology Department, Hospital Clinic, Universitat de Barcelona. Barcelona (Spain).

2. IDIBAPS, Institut d'Investigació August Pi i Sunyer (IDIBAPS). Barcelona (Spain).

3. Centro de Investigación Biomédica en Red de Enfermedades Cardiovasculares (CIBERCV), Madrid (Spain)

18/01/2022

Elena Arbelo

ELENA ARBELO  
LAINEZ - DNI  
44711739s

Firmado digitalmente por ELENA  
ARBELO LAINEZ - DNI 44711739s  
Fecha: 2022.01.18 10:46:37 +01'00'

Date

Name

Signature

## Conflicts of Interest

I hereby declare that I have no pecuniary or other personal interest, direct or indirect, in any matter that raises or may raise a conflict with my co-authorship of the manuscript "Early Diagnosis and Better Rhythm Management to improve outcomes in patients with Atrial Fibrillation: The 8th AFNET/EHRA Consensus Conference"

I hereby declare the following pecuniary or other personal interests, direct or indirect, which raise or may raise a conflict with my co-authorship of the manuscript "Early Diagnosis and Better Rhythm Management to improve outcomes in patients with Atrial Fibrillation: The 8th AFNET/EHRA Consensus Conference"

These interests are stated below:

Ownership / Employee: \_\_\_\_\_  
\_\_\_\_\_  
\_\_\_\_\_

Consulting Fees / Honoraria: **speaker's fees of small amount from Boston, Bayer, Daiichi, Boehringer.**

Research Grants: \_\_\_\_\_  
\_\_\_\_\_  
\_\_\_\_\_

Affiliation (please add your name and affiliation as it should appear on the paper): **Cardiology Division, Department of Biomedical, Metabolic and Neural Sciences, University of Modena and Reggio Emilia, Policlinico di Modena, Modena, Italy**

February 9, 2022 Prof Giuseppe BORIANI

|       |                                                                                      |
|-------|--------------------------------------------------------------------------------------|
| _____ | 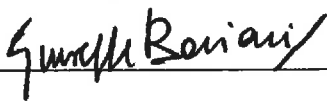 |
| Date  | Signature                                                                            |

## Conflicts of Interest

I hereby declare that I have no pecuniary or other personal interest, direct or indirect, in any matter that raises or may raise a conflict with my co-authorship of the manuscript "Early Diagnosis and Better Rhythm Management to improve outcomes in patients with Atrial Fibrillation: The 8th AFNET/EHRA Consensus Conference"

I hereby declare the following pecuniary or other personal interests, direct or indirect, which raise or may raise a conflict with my co-authorship of the manuscript "Early Diagnosis and Better Rhythm Management to improve outcomes in patients with Atrial Fibrillation: The 8th AFNET/EHRA Consensus Conference"

These interests are stated below :

Ownership / Employee: \_\_\_\_\_  
\_\_\_\_\_  
\_\_\_\_\_

Consulting Fees / Honoraria: SB is consultant for Medtronic, Boston Scientific, Microport, and Zoll.

Research Grants: \_\_\_\_\_  
\_\_\_\_\_  
\_\_\_\_\_

Affiliation (please add your name and affiliation as it should appear on the paper):

Serge Boveda

Affiliation 1: Cardiology - Heart Rhythm Management Department, Clinique Pasteur, 45 Avenue de Lombez, 31076 Toulouse, France

Affiliation 2: Universiteit Ziekenhuis, Vrije Universiteit Brussel (VUB), Laarbeeklaan 101, 1090 Jette Brussels, Belgium

<https://orcid.org/0000-0002-8425-3544> (if needed...)

---

Date: 12/12/2021

Name: BOVEDA

Signature:



Serge BOVEDA, MD, PhD

## Conflicts of Interest

I hereby declare that I have no pecuniary or other personal interest, direct or indirect, in any matter that raises or may raise a conflict with my co-authorship of the manuscript "Early Diagnosis and Better Rhythm Management to improve outcomes in patients with Atrial Fibrillation: The 8th AFNET/EHRA Consensus Conference"

I hereby declare the following pecuniary or other personal interests, direct or indirect, which raise or may raise a conflict with my co-authorship of the manuscript "Early Diagnosis and Better Rhythm Management to improve outcomes in patients with Atrial Fibrillation: The 8th AFNET/EHRA Consensus Conference"

These interests are stated below :

Ownership / Employee: \_\_\_\_\_  
\_\_\_\_\_  
\_\_\_\_\_

Consulting Fees / Honoraria: \_\_\_\_\_  
\_\_\_\_\_  
\_\_\_\_\_

Research Grants: \_\_\_\_\_  
\_\_\_\_\_  
\_\_\_\_\_

Affiliation (please add your name and affiliation as it should appear on the paper): Claire M. Buckley, School of Public Health, University College Cork, Ireland.



17.1.2022

Claire M. Buckley

Date

Name

Signature

## Conflicts of Interest

I hereby declare that I have no pecuniary or other personal interest, direct or indirect, in any matter that raises or may raise a conflict with my co-authorship of the manuscript "Early Diagnosis and Better Rhythm Management to improve outcomes in patients with Atrial Fibrillation: The 8th AFNET/EHRA Consensus Conference"

I hereby declare the following pecuniary or other personal interests, direct or indirect, which raise or may raise a conflict with my co-authorship of the manuscript "Early Diagnosis and Better Rhythm Management to improve outcomes in patients with Atrial Fibrillation: The 8th AFNET/EHRA Consensus Conference"

These interests are stated below:

Ownership / Employee: None  
\_\_\_\_\_  
\_\_\_\_\_

Consulting Fees / Honoraria: Acesion, Allergan, Alta Thera, Arca, Incarda, Menarini, Milestone, Sanofi, Bayer, Daiichi Sankyo, Pfizer, Abbott, Biosense Webster, Biotronik, Boston Scientific, Lilly, Medtronic, Johnson and Johnson  
\_\_\_\_\_

Research Grants: None  
\_\_\_\_\_  
\_\_\_\_\_

Affiliation (please add your name and affiliation as it should appear on the paper):

Professor A. John Camm

British Heart Foundation Professor of Clinical Cardiology  
St. George's University of London, London , United Kingdom

17/01/2022

John Camm

John Camm

Digitally signed by John  
Camm  
Date: 2022.01.17 13:58:43  
Z

Date

Name

Signature

## Conflicts of Interest

- I hereby declare that I have no pecuniary or other personal interest, direct or indirect, in any matter that raises or may raise a conflict with my co-authorship of the manuscript "Early Diagnosis and Better Rhythm Management to improve outcomes in patients with Atrial Fibrillation: The 8th AFNET/EHRA Consensus Conference"
- I hereby declare the following pecuniary or other personal interests, direct or indirect, which raise or may raise a conflict with my co-authorship of the manuscript "Early Diagnosis and Better Rhythm Management to improve outcomes in patients with Atrial Fibrillation: The 8th AFNET/EHRA Consensus Conference"

These interests are stated below:

Ownership / Employee: \_\_\_\_\_  
\_\_\_\_\_  
\_\_\_\_\_

Consulting Fees / Honoraria: \_\_\_\_\_  
\_\_\_\_\_  
\_\_\_\_\_

Research Grants: in kind research support from iRhythm  
\_\_\_\_\_  
\_\_\_\_\_

Affiliation (please add your name and affiliation as it should appear on the paper):

\_\_\_\_\_  
Prof Barbara Casadei, RDM, Division of Cardiovascular Medicine; British Heart Foundation Centre of Research Excellence

\_\_\_\_\_  
NIHR Oxford Biomedical Research Centre; University of Oxford.

17/01/2022

Barbara Casadei

Barbara  
Casadei

Digitally signed by Barbara  
Casadei  
Date: 2022.01.17 15:10:05  
Z

Date

Name

Signature



## Conflicts of Interest

I hereby declare that I have no pecuniary or other personal interest, direct or indirect, in any matter that raises or may raise a conflict with my co-authorship of the manuscript "Early Diagnosis and Better Rhythm Management to improve outcomes in patients with Atrial Fibrillation: The 8th AFNET/EHRA Consensus Conference"

I hereby declare the following pecuniary or other personal interests, direct or indirect, which raise or may raise a conflict with my co-authorship of the manuscript "Early Diagnosis and Better Rhythm Management to improve outcomes in patients with Atrial Fibrillation: The 8th AFNET/EHRA Consensus Conference"

These interests are stated below:

Ownership / Employee: \_\_\_\_\_  
\_\_\_\_\_  
\_\_\_\_\_

Consulting Fees / Honoraria: Advisory board member for Roche Diagnostics AG  
\_\_\_\_\_  
\_\_\_\_\_

Research Grants: \_\_\_\_\_  
\_\_\_\_\_  
\_\_\_\_\_

Affiliation (please add your name and affiliation as it should appear on the paper):

Winnie Chua - Institute of Cardiovascular Sciences, University of Birmingham, Birmingham, UK  
\_\_\_\_\_  
\_\_\_\_\_

21/01/2022

Winnie Chua

ChuaWY Digitally signed by ChuaWY  
Date: 2022.01.21 16:29:50  
+08'00'

Date

Name

Signature

## Conflicts of Interest

I hereby declare that I have no pecuniary or other personal interest, direct or indirect, in any matter that raises or may raise a conflict with my co-authorship of the manuscript "Early Diagnosis and Better Rhythm Management to improve outcomes in patients with Atrial Fibrillation: The 8th AFNET/EHRA Consensus Conference"

I hereby declare the following pecuniary or other personal interests, direct or indirect, which raise or may raise a conflict with my co-authorship of the manuscript "Early Diagnosis and Better Rhythm Management to improve outcomes in patients with Atrial Fibrillation: The 8th AFNET/EHRA Consensus Conference"

These interests are stated below:

Ownership / Employee: \_\_\_\_\_

\_\_\_\_\_  
\_\_\_\_\_

Consulting Fees / Honoraria: \_\_\_\_\_

\_\_\_\_\_  
\_\_\_\_\_

Research Grants: \_\_\_\_\_

\_\_\_\_\_  
\_\_\_\_\_

Affiliation (please add your name and affiliation as it should appear on the paper):

\_\_\_\_\_  
\_\_\_\_\_  
\_\_\_\_\_

17/01/2022

Nikolaos Dages

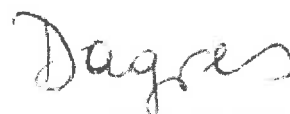

Date

Name

Signature

**Conflicts of Interest**

I hereby declare that I have no pecuniary or other personal interest, direct or indirect, in any matter that raises or may raise a conflict with my co-authorship of the manuscript "Early Diagnosis and Better Rhythm Management to improve outcomes in patients with Atrial Fibrillation: The 8th AFNET/EHRA Consensus Conference"

I hereby declare the following pecuniary or other personal interests, direct or indirect, which raise or may raise a conflict with my co-authorship of the manuscript "Early Diagnosis and Better Rhythm Management to improve outcomes in patients with Atrial Fibrillation: The 8th AFNET/EHRA Consensus Conference"

These interests are stated below:

Ownership / Employee: MIRKO DE MEUS IS A  
MEDTRONIC EMPLOYEE

Consulting Fees / Honoraria: \_\_\_\_\_

Research Grants: \_\_\_\_\_

Affiliation (please add your name and affiliation as it should appear on the paper):

MIRKO DE MEUS, SR. RESEARCH MANAGER,  
BAKKEN RESEARCH CENTER, MAASTRICHT, NL

17 DEC 2021      MIRKO DE MEUS      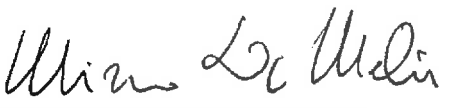

|      |      |           |
|------|------|-----------|
| Date | Name | Signature |
|------|------|-----------|

## Conflicts of Interest

I hereby declare that I have no pecuniary or other personal interest, direct or indirect, in any matter that raises or may raise a conflict with my co-authorship of the manuscript "Early Diagnosis and Better Rhythm Management to improve outcomes in patients with Atrial Fibrillation: The 8th AFNET/EHRA Consensus Conference"

I hereby declare the following pecuniary or other personal interests, direct or indirect, which raise or may raise a conflict with my co-authorship of the manuscript "Early Diagnosis and Better Rhythm Management to improve outcomes in patients with Atrial Fibrillation: The 8th AFNET/EHRA Consensus Conference"

These interests are stated below :

Ownership / Employee: \_\_\_\_\_

\_\_\_\_\_

Consulting Fees / Honoraria: \_\_\_\_\_

\_\_\_\_\_

Research Grants: \_\_\_\_\_

\_\_\_\_\_

Affiliation (please add your name and affiliation as it should appear on the paper):

Lien Desteghe

a: Research Group Cardiovascular Diseases, University of Antwerp, Prinsstraat 13, 2000 Antwerp, Belgium

b: Department of Cardiology, Antwerp University Hospital, Drie Eikenstraat 655, 2650 Edegem, Belgium

c: Faculty of Medicine and Life Sciences, Hasselt University, Martelarenlaan 42, 3500 Hasselt, Belgium

d: Heart Centre Hasselt, Jessa Hospital, Stadsomvaart 11, 3500 Hasselt, Belgium

28/12/2021

Lien Desteghe



Date

Name

Signature

## Conflicts of Interest

I hereby declare that I have no pecuniary or other personal interest, direct or indirect, in any matter that raises or may raise a conflict with my co-authorship of the manuscript "Early Diagnosis and Better Rhythm Management to improve outcomes in patients with Atrial Fibrillation: The 8th AFNET/EHRA Consensus Conference"

I hereby declare the following pecuniary or other personal interests, direct or indirect, which raise or may raise a conflict with my co-authorship of the manuscript "Early Diagnosis and Better Rhythm Management to improve outcomes in patients with Atrial Fibrillation: The 8th AFNET/EHRA Consensus Conference"

These interests are stated below :

**Ownership / Employee:**

Vital Beats

---

**Consulting Fees / Honoraria:**

Member of Advisory Board in Bristol Myers Squibb-Pfizer

---

**Research Grants:**

None

---

**Affiliation (please add your name and affiliation as it should appear on the paper):**

Department of Cardiology, Copenhagen University Hospital – Rigshospitalet, Copenhagen, Denmark

---

December 19<sup>th</sup> 2021

Søren Zöga Diederichsen



Date

Name

Signature

Conflicts of Interest

I hereby declare that I have no pecuniary or other personal interest, direct or indirect, in any matter that raises or may raise a conflict with my co-authorship of the manuscript "Early Diagnosis and Better Rhythm Management to improve outcomes in patients with Atrial Fibrillation: The 8th AFNET/EHRA Consensus Conference"

I hereby declare the following pecuniary or other personal interests, direct or indirect, which raise or may raise a conflict with my co-authorship of the manuscript "Early Diagnosis and Better Rhythm Management to improve outcomes in patients with Atrial Fibrillation: The 8th AFNET/EHRA Consensus Conference"

These interests are stated below:

Ownership / Employee: none

Consulting Fees / Honoraria: Abbott, Astra Zeneca, Bayer Boston Scientific, Bristol Myers Squibb, Medtronic, Pfizer, ZOLL

Research Grants: none

Affiliation (please add your name and affiliation as it should appear on the paper):

DAVID DUNCKER

Hannover Heart Rhythm Center, Department of Cardiology and Angiology, Hannover Medical School, Hannover, Germany

please note that this is the correct order!

10-DEC-2021 David Duncker

Date

Name

Signature

### Conflicts of Interest

- I hereby declare that I have no pecuniary or other personal interest, direct or indirect, in any matter that raises or may raise a conflict with my co-authorship of the manuscript "Early Diagnosis and Better Rhythm Management to improve outcomes in patients with Atrial Fibrillation: The 8th AFNET/EHRA Consensus Conference"
- I hereby declare the following pecuniary or other personal interests, direct or indirect, which raise or may raise a conflict with my co-authorship of the manuscript "Early Diagnosis and Better Rhythm Management to improve outcomes in patients with Atrial Fibrillation: The 8th AFNET/EHRA Consensus Conference"

These interests are stated below:

Ownership / Employee: \_\_\_\_\_

none

Consulting Fees / Honoraria: Lecture honoraria: Medtronic, Biotronik, Boston Scientific, Boehringer Ingelheim, Daiichi Sankyo, Bayer, MMS, Pfizer, Sanofi, \_\_\_\_\_

Research Grants: DFG, DGK

Affiliation (please add your name and affiliation as it should appear on the paper):

Division of Electrophysiology, Department of Cardiology and Angiology, Münster, Germany.

19/01/2022

Lars Eckardt

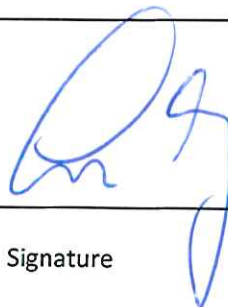

Date

Name

Signature

## Conflicts of Interest

I hereby declare that I have no pecuniary or other personal interest, direct or indirect, in any matter that raises or may raise a conflict with my co-authorship of the manuscript "Early Diagnosis and Better Rhythm Management to improve outcomes in patients with Atrial Fibrillation: The 8th AFNET/EHRA Consensus Conference"

I hereby declare the following pecuniary or other personal interests, direct or indirect, which raise or may raise a conflict with my co-authorship of the manuscript "Early Diagnosis and Better Rhythm Management to improve outcomes in patients with Atrial Fibrillation: The 8th AFNET/EHRA Consensus Conference"

These interests are stated below:

Ownership / Employee: Employee of Preventicus GmbH

\_\_\_\_\_

\_\_\_\_\_

Consulting Fees / Honoraria: -

\_\_\_\_\_

\_\_\_\_\_

Research Grants: -

\_\_\_\_\_

\_\_\_\_\_

Affiliation (please add your name and affiliation as it should appear on the paper):

Christoph Eisert (Preventicus)

\_\_\_\_\_

\_\_\_\_\_

05/02/2022

Christoph Eisert



Date

Name

Signature



Conflicts of Interest

I hereby declare that I have no pecuniary or other personal interest, direct or indirect, in any matter that raises or may raise a conflict with my co-authorship of the manuscript "Early Diagnosis and Better Rhythm Management to improve outcomes in patients with Atrial Fibrillation: The 8th AFNET/EHRA Consensus Conference"

I hereby declare the following pecuniary or other personal interests, direct or indirect, which raise or may raise a conflict with my co-authorship of the manuscript "Early Diagnosis and Better Rhythm Management to improve outcomes in patients with Atrial Fibrillation: The 8th AFNET/EHRA Consensus Conference"

These interests are stated below:

Ownership / Employee:

---

---

---

---

---

Consulting Fees / Honoraria:

---

---

---

---

---

Research Grants:

---

---

---

---

---

Affiliation (please add your name and affiliation as it should appear on the paper): D. Engler

1. Department of Cardiology, University Heart and Vascular Center Hamburg

University Medical Center Hamburg-Eppendorf,  
Hamburg, Germany  
2. German Center of Cardiovascular Research (DZHK)  
partner site Hamburg/Kiel/Lübeck, Berlin, Germany.

---

7.1.22 Daniel Engler D. Engler  
Date Name Signature  
Consensus Conference 2021 Publication\_Conflicts of Interest  
Form\_final 1.0\_20211126

## Conflicts of Interest

I hereby declare that I have no pecuniary or other personal interest, direct or indirect, in any matter that raises or may raise a conflict with my co-authorship of the manuscript "Early Diagnosis and Better Rhythm Management to improve outcomes in patients with Atrial Fibrillation: The 8th AFNET/EHRA Consensus Conference"

I hereby declare the following pecuniary or other personal interests, direct or indirect, which raise or may raise a conflict with my co-authorship of the manuscript "Early Diagnosis and Better Rhythm Management to improve outcomes in patients with Atrial Fibrillation: The 8th AFNET/EHRA Consensus Conference"

These interests are stated below:

Ownership / Employee: \_\_\_\_\_

\_\_\_\_\_  
\_\_\_\_\_

Consulting Fees / Honoraria: \_\_\_\_\_

\_\_\_\_\_  
\_\_\_\_\_

**Research Grants:** \_\_\_\_ LF has received institutional research grants and non-financial support from European Union, DFG, British Heart Foundation, Medical Research Council (UK), NIHR, and several biomedical companies.

The Institute of Cardiovascular Research, University of Birmingham, has received an Accelerator Award by the British Heart Foundation AA/18/2/34218.

LF is listed as inventor of two patents held by University of Birmingham (Atrial Fibrillation Therapy WO 2015140571, Markers for Atrial Fibrillation WO 2016012783).

\_\_\_\_\_  
\_\_\_\_\_  
\_\_\_\_\_

Affiliation (please add your name and affiliation as it should appear on the paper):

\_\_\_\_\_

1. University Center of Cardiovascular Science, Hamburg, University Heart & Vascular Center Hamburg
  2. Department of Cardiology, University Medical Center Hamburg-Eppendorf
  3. DZHK-Standort Hamburg/Kiel/Lübeck
  4. Institute of Cardiovascular Sciences, University of Birmingham
- 
- 

29<sup>th</sup> December 2021 Larissa Fabritz



Date

Name

Signature

## Conflicts of Interest

I hereby declare that I have no pecuniary or other personal interest, direct or indirect, in any matter that raises or may raise a conflict with my co-authorship of the manuscript "Early Diagnosis and Better Rhythm Management to improve outcomes in patients with Atrial Fibrillation: The 8th AFNET/EHRA Consensus Conference"

I hereby declare the following pecuniary or other personal interests, direct or indirect, which raise or may raise a conflict with my co-authorship of the manuscript "Early Diagnosis and Better Rhythm Management to improve outcomes in patients with Atrial Fibrillation: The 8th AFNET/EHRA Consensus Conference"

These interests are stated below:

**Ownership / Employee:** Nil

**Consulting Fees / Honoraria:** Bristol-Myers Squibb and Pfizer Alliance, Bayer, Daiichi Sankyo, Omron. (largely speaker fees and travel support for speaking at session or official satellites of large international/continental society meetings)

**Research Grants:** Investigator-initiated research grants to the institution from Bristol-Myers Squibb and Pfizer Alliance

**Affiliation** (please add your name and affiliation as it should appear on the paper):

Ben Freedman. Heart Research Institute, Charles Perkins Centre, Faculty of Medicine and Health, University of Sydney, Sydney, Australia

15/1/22

Prof Ben Freedman



Date

Name

Signature

**Conflicts of Interest**

I hereby declare that I have no pecuniary or other personal interest, direct or indirect, in any matter that raises or may raise a conflict with my co-authorship of the manuscript "Early Diagnosis and Better Rhythm Management to improve outcomes in patients with Atrial Fibrillation: The 8th AFNET/EHRA Consensus Conference"

I hereby declare the following pecuniary or other personal interests, direct or indirect, which raise or may raise a conflict with my co-authorship of the manuscript "Early Diagnosis and Better Rhythm Management to improve outcomes in patients with Atrial Fibrillation: The 8th AFNET/EHRA Consensus Conference"

These interests are stated below :

Ownership / Employee: Employee of Roche Diagnostics International Ltd.

---

---

---

Consulting Fees / Honoraria: \_\_\_\_\_

---

---

Research Grants: \_\_\_\_\_

---

---

Affiliation (please add your name and affiliation as it should appear on the paper):

Ludovic Gillet

Roche Diagnostics International Ltd, Rotkreuz, Switzerland

Date

Name

Signature

17-Dec-2021

Ludovic Gillet



**Conflicts of Interest**

I hereby declare that I have no pecuniary or other personal interest, direct or indirect, in any matter that raises or may raise a conflict with my co-authorship of the manuscript "Early Diagnosis and Better Rhythm Management to improve outcomes in patients with Atrial Fibrillation: The 8th AFNET/EHRA Consensus Conference"

I hereby declare the following pecuniary or other personal interests, direct or indirect, which raise or may raise a conflict with my co-authorship of the manuscript "Early Diagnosis and Better Rhythm Management to improve outcomes in patients with Atrial Fibrillation: The 8th AFNET/EHRA Consensus Conference"

These interests are stated below:

Ownership / Employee: \_\_\_\_\_  
\_\_\_\_\_  
\_\_\_\_\_

Consulting Fees / Honoraria: Daiichi-Sankyo, Bayer  
Boehringer, Pfizer/BMS, Vioxx, Amicus  
Medtronic, Astra-Zeneca, Boehringer-Ingelheim

Research Grants: \_\_\_\_\_  
\_\_\_\_\_  
\_\_\_\_\_

Affiliation (please add your name and affiliation as it should appear on the paper):  
\_\_\_\_\_  
\_\_\_\_\_  
\_\_\_\_\_

18/01/2022 Peter Goette

Date

Name

Prof. Dr. med. Andreas Goette  
Abt. Intern. Medizin/Kardiologie  
u. Interventionelle Intensivmedizin  
Chirurg. u. Medizinischen Klinik II  
u. Intensivmedizin  
Herz-Krankenhaus (HKK)  
Hilfenstraße 2, 83200 Paderborn

Signature

## Conflicts of Interest

I hereby declare that I have no pecuniary or other personal interest, direct or indirect, in any matter that raises or may raise a conflict with my co-authorship of the manuscript "Early Diagnosis and Better Rhythm Management to improve outcomes in patients with Atrial Fibrillation: The 8th AFNET/EHRA Consensus Conference"

I hereby declare the following pecuniary or other personal interests, direct or indirect, which raise or may raise a conflict with my co-authorship of the manuscript "Early Diagnosis and Better Rhythm Management to improve outcomes in patients with Atrial Fibrillation: The 8th AFNET/EHRA Consensus Conference"

These interests are stated below :

Ownership / Employee: \_\_\_\_\_  
\_\_\_\_\_

Consulting Fees / Honoraria: \_\_\_\_\_  
\_\_\_\_\_

Research Grants: \_\_\_\_\_  
\_\_\_\_\_  
\_\_\_\_\_

Affiliation (please add your name and affiliation as it should appear on the paper):

1.- *Institut Cardiovascular, Hospital Clinic, Universitat de Barcelona, Catalonia, Spain.*

2.- *IDIBAPS, Barcelona, Catalonia, Spain*

3.- *CIBERCV, Spain*

\_\_\_\_\_

15<sup>th</sup> January 2022      Eduard Guasch      \_\_\_\_\_

Date

Name

Signature



Firmado digitalmente por EDUARD GUASCH CASANY / num:08377841  
Nombre de reconocimiento (DN): c=ES, st=BARCELONA, o=Col·legi Oficial de Metges de Barcelona / COMB / 0005, ou=COL·LEGIAT, title=CARDIOLOGIA, sn=GUASCH CASANY, givenName=EDUARD, serialNumber=S2429738L, cn=EDUARD GUASCH CASANY / num:08377841, email=eguasch@clinic.cat  
Fecha: 2022.01.15 19:33:21 +01'00'



## Conflicts of Interest

I hereby declare that I have no pecuniary or other personal interest, direct or indirect, in any matter that raises or may raise a conflict with my co-authorship of the manuscript "Early Diagnosis and Better Rhythm Management to improve outcomes in patients with Atrial Fibrillation: The 8th AFNET/EHRA Consensus Conference"

I hereby declare the following pecuniary or other personal interests, direct or indirect, which raise or may raise a conflict with my co-authorship of the manuscript "Early Diagnosis and Better Rhythm Management to improve outcomes in patients with Atrial Fibrillation: The 8th AFNET/EHRA Consensus Conference"

These interests are stated below:

**Ownership / Employee:**

No

---

**Consulting Fees / Honoraria:**

Member of Advisory board in Medtronic; Speaker fee from Medtronic

---

**Research Grants:**

Research grant from Medtronic

---

**Affiliation (please add your name and affiliation as it should appear on the paper):**

Department of Cardiology, Copenhagen University Hospital – Rigshospitalet, Copenhagen, Denmark and

Department of Clinical Medicine, Faculty of Health and Medical Sciences, University of Copenhagen, Denmark

---

14<sup>th</sup> December 2021

Jesper Hastrup Svendsen\_



Date

Name

Signature

**Conflicts of Interest**

I hereby declare that I have no pecuniary or other personal interest, direct or indirect, in any matter that raises or may raise a conflict with my co-authorship of the manuscript "Early Diagnosis and Better Rhythm Management to improve outcomes in patients with Atrial Fibrillation: The 8th AFNET/EHRA Consensus Conference"

I hereby declare the following pecuniary or other personal interests, direct or indirect, which raise or may raise a conflict with my co-authorship of the manuscript "Early Diagnosis and Better Rhythm Management to improve outcomes in patients with Atrial Fibrillation: The 8th AFNET/EHRA Consensus Conference"

These interests are stated below:

Ownership / Employee: \_\_\_\_\_  
\_\_\_\_\_  
\_\_\_\_\_

Consulting Fees / Honoraria: \_\_\_\_\_  
\_\_\_\_\_  
\_\_\_\_\_

Research Grants: \_\_\_\_\_  
\_\_\_\_\_  
\_\_\_\_\_

Affiliation (please add your name and affiliation as it should appear on the paper):  
\_\_\_\_\_  
\_\_\_\_\_  
\_\_\_\_\_

Date *02 2<sup>nd</sup> 2022* Name *Hatem Stephens* Signature *Hatem Stephens*

## Conflicts of Interest

- I hereby declare that I have no pecuniary or other personal interest, direct or indirect, in any matter that raises or may raise a conflict with my co-authorship of the manuscript "Early Diagnosis and Better Rhythm Management to improve outcomes in patients with Atrial Fibrillation: The 8th AFNET/EHRA Consensus Conference"
- I hereby declare the following pecuniary or other personal interests, direct or indirect, which raise or may raise a conflict with my co-authorship of the manuscript "Early Diagnosis and Better Rhythm Management to improve outcomes in patients with Atrial Fibrillation: The 8th AFNET/EHRA Consensus Conference"

These interests are stated below:

Ownership / Employee: \_\_\_\_\_

**None**

Consulting Fees / Honoraria: \_\_\_\_\_

Abbott, Alexion, AMARIN, AstraZeneca, Bayer, Biotronik, Boehringer Ingelheim, Bristol-Myers-Squibb, Daiichi Sankyo,

Edwards Lifesciences, Medtronic, Pfizer, Premier Research, SUN Pharma and W. L. Gore & Associates.

Research Grants: \_\_\_\_\_

**Bayer Vital, Sanofi-Aventis**

Affiliation (please add your name and affiliation as it should appear on the paper):

Department of Neurology, Universitätsklinikum Würzburg, Germany

**Atrial Fibrillation NETwork (AFNET), Münster, Germany**

19/01/2022

Karl Georg Haeusler

Prof. Dr. Karl  
Georg Häusler

Digital unterschrieben von  
Prof. Dr. Karl Georg Häusler  
Datum: 2022.01.19  
18:16:03 +01'00'

Date

Name

Signature

## Conflicts of Interest

I hereby declare that I have no pecuniary or other personal interest, direct or indirect, in any matter that raises or may raise a conflict with my co-authorship of the manuscript "Early Diagnosis and Better Rhythm Management to improve outcomes in patients with Atrial Fibrillation: The 8th AFNET/EHRA Consensus Conference"

I hereby declare the following pecuniary or other personal interests, direct or indirect, which raise or may raise a conflict with my co-authorship of the manuscript "Early Diagnosis and Better Rhythm Management to improve outcomes in patients with Atrial Fibrillation: The 8th AFNET/EHRA Consensus Conference"

These interests are stated below :

Ownership / Employee: \_\_\_\_\_

**None**

Consulting Fees / Honoraria: \_\_\_\_\_

**Boston Scientific, Servier, BMS/Pfizer, Bayer, Myokardia**

Research Grants: **BMS/Pfizer, Medtronic, Boston Scientific, Abbott,**

Affiliation (please add your name and affiliation as it should appear on the paper):

**Population Health Research Institute, McMaster University  
Hamilton, Ontario, Canada**

16/01/2022

Jeff Healey

**Jeff Healey**

Digitally signed by Jeff Healey  
Date: 2022.01.17 08:30:05  
-05'00'

Date

Name

Signature

## **Conflicts of Interest - Hein Heidbuchel**

I hereby declare that I have no pecuniary or other personal interest, direct or indirect, in any matter that raises or may raise a conflict with my co-authorship of the manuscript "Early Diagnosis and Better Rhythm Management to improve outcomes in patients with Atrial Fibrillation: The 8th AFNET/EHRA Consensus Conference"

I hereby declare the following pecuniary or other personal interests, direct or indirect, which raise or may raise a conflict with my co-authorship of the manuscript "Early Diagnosis and Better Rhythm Management to improve outcomes in patients with Atrial Fibrillation: The 8th AFNET/EHRA Consensus Conference"

These interests are stated below:

Ownership / Employee: none

Consulting Fees / Honoraria: Dr. Heidbuchel did receive personal lecture and consultancy fees from Abbott, Biotronik, Daiichi-Sankyo, Pfizer-BMS, Medscape, Pfizer-BMS and Springer Healthcare Ltd.

Research Grants: Dr. Heidbuchel received unconditional research grants through the University of Antwerp and/or the University of Hasselt from Abbott, Bayer, Biotronik, Biosense-Webster, Boston-Scientific, Boehringer-Ingelheim, Daiichi-Sankyo, Fibricheck/Qompium, Medtronic, and Pfizer-BMS, all outside the scope of this work.

Affiliation (please add your name and affiliation as it should appear on the paper):

Department of Cardiology, University Hospital Antwerp  
Cardiovascular Research, Antwerp University

---

Date: December 20, 2021 Name: Hein Heidbuchel

Signature



## Conflicts of Interest

I hereby declare that I have no pecuniary or other personal interest, direct or indirect, in any matter that raises or may raise a conflict with my co-authorship of the manuscript "Early Diagnosis and Better Rhythm Management to improve outcomes in patients with Atrial Fibrillation: The 8th AFNET/EHRA Consensus Conference"

I hereby declare the following pecuniary or other personal interests, direct or indirect, which raise or may raise a conflict with my co-authorship of the manuscript "Early Diagnosis and Better Rhythm Management to improve outcomes in patients with Atrial Fibrillation: The 8th AFNET/EHRA Consensus Conference"

These interests are stated below:

Ownership / Employee: none  
\_\_\_\_\_  
\_\_\_\_\_

Consulting Fees / Honoraria: none  
\_\_\_\_\_  
\_\_\_\_\_

Research Grants: none  
\_\_\_\_\_  
\_\_\_\_\_

Affiliation (please add your name and affiliation as it should appear on the paper):  
Heart Center Leipzig at University Leipzig,  
Leipzig Heart Insitute, Leipzig Germany  
\_\_\_\_\_

|                   |                          |                                                                                             |
|-------------------|--------------------------|---------------------------------------------------------------------------------------------|
| <u>17/01/2022</u> | <u>Gerhard Hindricks</u> | <u></u> |
| Date              | Name                     | Signature                                                                                   |

**Conflicts of Interest**

I hereby declare that I have no pecuniary or other personal interest, direct or indirect, in any matter that raises or may raise a conflict with my co-authorship of the manuscript "Early Diagnosis and Better Rhythm Management to improve outcomes in patients with Atrial Fibrillation: The 8th AFNET/EHRA Consensus Conference"

I hereby declare the following pecuniary or other personal interests, direct or indirect, which raise or may raise a conflict with my co-authorship of the manuscript "Early Diagnosis and Better Rhythm Management to improve outcomes in patients with Atrial Fibrillation: The 8th AFNET/EHRA Consensus Conference"

These interests are stated below:

Ownership / Employee: NA  
\_\_\_\_\_  
\_\_\_\_\_

Consulting Fees / Honoraria: Occasional speaking fees for BI, Bayer and Pfizer/BMS in AF or anticoagulation  
\_\_\_\_\_  
\_\_\_\_\_

Research Grants: AZ for COVID research  
\_\_\_\_\_  
\_\_\_\_\_

Affiliation (please add your name and affiliation as it should appear on the paper):  
FD Richard Hobbs, Oxford Primary Care, University of Oxford  
\_\_\_\_\_  
\_\_\_\_\_

02/02/2022

FD Richard Hobbs

Richard Hobbs

Digitally signed by Richard Hobbs  
Date: 2022.02.02 13:06:38  
Z

Date

Name

Signature

## Conflicts of Interest

I hereby declare that I have no pecuniary or other personal interest, direct or indirect, in any matter that raises or may raise a conflict with my co-authorship of the manuscript "Early Diagnosis and Better Rhythm Management to improve outcomes in patients with Atrial Fibrillation: The 8th AFNET/EHRA Consensus Conference"

I hereby declare the following pecuniary or other personal interests, direct or indirect, which raise or may raise a conflict with my co-authorship of the manuscript "Early Diagnosis and Better Rhythm Management to improve outcomes in patients with Atrial Fibrillation: The 8th AFNET/EHRA Consensus Conference"

These interests are stated below :

Ownership / Employee: CEO of Preventicus GmbH (Cardiac Rhythm and Care Management Provider)

\_\_\_\_\_  
\_\_\_\_\_

Consulting Fees / Honoraria: -

\_\_\_\_\_  
\_\_\_\_\_

Research Grants: -

\_\_\_\_\_  
\_\_\_\_\_

Affiliation (please add your name and affiliation as it should appear on the paper):  
Thomas Huebner (Preventicus)

\_\_\_\_\_  
\_\_\_\_\_

02/02/2022

Thomas Huebner

Dr. Thomas  
Huebner

Digital unterschrieben von  
Dr. Thomas Huebner  
Datum: 2022.02.02  
13:18:22 +01'00'

Date

Name

Signature



## Conflicts of Interest

I hereby declare that I have no pecuniary or other personal interest, direct or indirect, in any matter that raises or may raise a conflict with my co-authorship of the manuscript "Early Diagnosis and Better Rhythm Management to improve outcomes in patients with Atrial Fibrillation: The 8th AFNET/EHRA Consensus Conference"

I hereby declare the following pecuniary or other personal interests, direct or indirect, which raise or may raise a conflict with my co-authorship of the manuscript "Early Diagnosis and Better Rhythm Management to improve outcomes in patients with Atrial Fibrillation: The 8th AFNET/EHRA Consensus Conference"

These interests are stated below :

Ownership / Employee: \_\_\_\_\_  
\_\_\_\_\_  
\_\_\_\_\_

Consulting Fees / Honoraria: \_\_\_\_\_

Bayer (Advisory Board), AtriCure (Speaker fees), Protherics Medicines Development (Advisory Board) and Myokardia (Advisory Board)

Research Grants: \_\_\_\_\_

Grants from the National Institute for Health Research (NIHR CDF-2015-08-074 RATE-AF; NIHR HTA-130280 DaRe2THINK; NIHR EME-132974 D2T-NV), the British Heart Foundation (PG/17/55/33087, AA/18/2/34218 and FS/CDRF/21/21032), EU/EFPIA Innovative Medicines Initiative (BigData@Heart 116074), the European Society of Cardiology supported by educational grants from Boehringer Ingelheim/BMS-Pfizer Alliance/Bayer/Daiichi Sankyo/Boston Scientific, the NIHR/University of Oxford Biomedical Research Centre and British Heart Foundation/University of Birmingham Accelerator Award (STEEER-AF NCT04396418), Amomed Pharma and IRCCS San Raffaele/Menarini (Beta-blockers in Heart Failure Collaborative Group NCT0083244)

Affiliation (please add your name and affiliation as it should appear on the paper):

\_\_\_\_\_  
University of Birmingham & University Hospitals Birmingham NHS Foundation Trust

Date

Name

Signature

13/12/21

Prof Dipak Kotecha

A handwritten signature in black ink, appearing to read 'Dipak Kotecha', with a long horizontal flourish extending to the right.

**Conflicts of Interest**

I hereby declare that I have no pecuniary or other personal interest, direct or indirect, in any matter that raises or may raise a conflict with my co-authorship of the manuscript "Early Diagnosis and Better Rhythm Management to improve outcomes in patients with Atrial Fibrillation: The 8th AFNET/EHRA Consensus Conference"

X I hereby declare the following pecuniary or other personal interests, direct or indirect, which raise or may raise a conflict with my co-authorship of the manuscript "Early Diagnosis and Better Rhythm Management to improve outcomes in patients with Atrial Fibrillation: The 8th AFNET/EHRA Consensus Conference"

These interests are stated below:

Ownership / Employee:

I'm employee of Bristol-Myers Squibb Munich Medical Department Cardiovascular Germany

---

---

Consulting Fees / Honoraria: none

---

Research Grants: none

---

---

---

Affiliation (please add your name and affiliation as it should appear on the paper):

Michael Krekler, Ph.D., Bristol-Myers Squibb, Medical Department Cardiovascular Germany

19.02.2021 Michael Krekler Michael Krekler

Date Name Signature

## Conflicts of Interest

I hereby declare that I have no pecuniary or other personal interest, direct or indirect, in any matter that raises or may raise a conflict with my co-authorship of the manuscript "Early Diagnosis and Better Rhythm Management to improve outcomes in patients with Atrial Fibrillation: The 8th AFNET/EHRA Consensus Conference"

I hereby declare the following pecuniary or other personal interests, direct or indirect, which raise or may raise a conflict with my co-authorship of the manuscript "Early Diagnosis and Better Rhythm Management to improve outcomes in patients with Atrial Fibrillation: The 8th AFNET/EHRA Consensus Conference"

These interests are stated below :

Ownership / Employee: none

\_\_\_\_\_

\_\_\_\_\_

Consulting Fees / Honoraria: medtronic, Boston, Biotronik, BMS-Pfizer

\_\_\_\_\_

\_\_\_\_\_

Research Grants: Rennes university hospital Medtronic Biotronik, Boston

\_\_\_\_\_

\_\_\_\_\_

Affiliation (please add your name and affiliation as it should appear on the paper):

1 Univ Rennes, CHU Rennes, LTSI-UMR1099, F-35000 Rennes, France

\_\_\_\_\_

\_\_\_\_\_

07/02/2022

Leclercq

**Leclercq**

Signature numérique de  
Leclercq  
Date : 2022.02.07 13:30:22  
+01'00'

Date

Name

Signature

**Conflicts of Interest**

I hereby declare that I have no pecuniary or other personal interest, direct or indirect, in any matter that raises or may raise a conflict with my co-authorship of the manuscript "Early Diagnosis and Better Rhythm Management to improve outcomes in patients with Atrial Fibrillation: The 8th AFNET/EHRA Consensus Conference"

I hereby declare the following pecuniary or other personal interests, direct or indirect, which raise or may raise a conflict with my co-authorship of the manuscript "Early Diagnosis and Better Rhythm Management to improve outcomes in patients with Atrial Fibrillation: The 8th AFNET/EHRA Consensus Conference"

These interests are stated below:

Ownership / Employee: \_\_\_\_\_  
\_\_\_\_\_  
\_\_\_\_\_

Consulting Fees / Honoraria: \_\_\_\_\_  
\_\_\_\_\_  
\_\_\_\_\_

Research Grants: \_\_\_\_\_  
\_\_\_\_\_  
\_\_\_\_\_

Affiliation (please add your name and affiliation as it should appear on the paper):

Hospital Klinik für die Dept. of Cardiology  
and Clinic of Bonn, Bonn, Germany  
(see e-mail)

17.12.2021 Thorsten Lewalter

Date

Name

Signature

**Conflicts of Interest**

I hereby declare that I have no pecuniary or other personal interest, direct or indirect, in any matter that raises or may raise a conflict with my co-authorship of the manuscript "Early Diagnosis and Better Rhythm Management to improve outcomes in patients with Atrial Fibrillation: The 8th AFNET/EHRA Consensus Conference"

I hereby declare the following pecuniary or other personal interests, direct or indirect, which raise or may raise a conflict with my co-authorship of the manuscript "Early Diagnosis and Better Rhythm Management to improve outcomes in patients with Atrial Fibrillation: The 8th AFNET/EHRA Consensus Conference"

These interests are stated below :

Ownership / Employee: \_\_\_\_\_  
\_\_\_\_\_  
\_\_\_\_\_

Consulting Fees / Honoraria: \_\_\_\_\_  
\_\_\_\_\_  
\_\_\_\_\_

Research Grants: \_\_\_\_\_  
\_\_\_\_\_  
\_\_\_\_\_

Affiliation (please add your name and affiliation as it should appear on the paper):  
Honghuang Lin  
\_\_\_\_\_  
**Department of Medicine**  
\_\_\_\_\_  
**University of Massachusetts Medical School**  
\_\_\_\_\_

17/01/2022      Honghuang Lin      

Date                                          Name                                          Signature

## Conflicts of Interest

I hereby declare that I have no pecuniary or other personal interest, direct or indirect, in any matter that raises or may raise a conflict with my co-authorship of the manuscript "Early Diagnosis and Better Rhythm Management to improve outcomes in patients with Atrial Fibrillation: The 8th AFNET/EHRA Consensus Conference"

I hereby declare the following pecuniary or other personal interests, direct or indirect, which raise or may raise a conflict with my co-authorship of the manuscript "Early Diagnosis and Better Rhythm Management to improve outcomes in patients with Atrial Fibrillation: The 8th AFNET/EHRA Consensus Conference"

These interests are stated below:

Ownership / Employee: None,

Consulting Fees / Honoraria: No personal consulting fees.

Research Grants: EHRA-PATHS, NovoNordisk Young Investigator Award.

Affiliation (please add your name and affiliation as it should appear on the paper):

Department of Cardiology, Maastricht University Medical Center and Cardiovascular Research Institute Maastricht, Maastricht, The Netherlands. Department of Biomedical Sciences, Faculty of Health and Medical Sciences, University of Copenhagen, Copenhagen, Denmark.

12.12.2021

Dominik Linz



---

Date

Name

Signature

**Conflicts of Interest**

I hereby declare that I have no pecuniary or other personal interest, direct or indirect, in any matter that raises or may raise a conflict with my co-authorship of the manuscript "Early Diagnosis and Better Rhythm Management to improve outcomes in patients with Atrial Fibrillation: The 8th AFNET/EHRA Consensus Conference"

I hereby declare the following pecuniary or other personal interests, direct or indirect, which raise or may raise a conflict with my co-authorship of the manuscript "Early Diagnosis and Better Rhythm Management to improve outcomes in patients with Atrial Fibrillation: The 8th AFNET/EHRA Consensus Conference"

These interests are stated below:

Ownership / Employee: \_\_\_\_\_  
\_\_\_\_\_  
\_\_\_\_\_

Consulting Fees / Honoraria: \_\_\_\_\_  
\_\_\_\_\_  
\_\_\_\_\_

Research Grants: \_\_\_\_\_  
\_\_\_\_\_  
\_\_\_\_\_

Affiliation (please add your name and affiliation as it should appear on the paper):  
\_\_\_\_\_  
\_\_\_\_\_  
\_\_\_\_\_

Date 14 Jan 2021

Name Gregory Lip

\_\_\_\_\_  
Signature 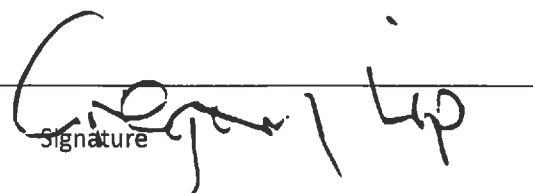



## Conflicts of Interest

I hereby declare that I have no pecuniary or other personal interest, direct or indirect, in any matter that raises or may raise a conflict with my co-authorship of the manuscript "Early Diagnosis and Better Rhythm Management to improve outcomes in patients with Atrial Fibrillation: The 8th AFNET/EHRA Consensus Conference"

I hereby declare the following pecuniary or other personal interests, direct or indirect, which raise or may raise a conflict with my co-authorship of the manuscript "Early Diagnosis and Better Rhythm Management to improve outcomes in patients with Atrial Fibrillation: The 8th AFNET/EHRA Consensus Conference"

These interests are stated below :

Ownership / Employee: \_\_\_\_\_

\_\_\_\_\_  
\_\_\_\_\_

Consulting Fees / Honoraria: \_\_\_\_\_

I have received one lecture fee from BMS outside this work

\_\_\_\_\_  
\_\_\_\_\_

Research Grants: \_\_\_\_\_

I have received funding as partner from the European Union's Horizon 2020 research and innovation programme under the grant agreement no. 847770 (AFFECT-EU)

\_\_\_\_\_  
\_\_\_\_\_

Affiliation (please add your name and affiliation as it should appear on the paper):

Maja-Lisa Løchen, Department of Community Medicine, UiT The Arctic University of Norway, Tromsø, Norway

\_\_\_\_\_  
\_\_\_\_\_  
\_\_\_\_\_

Maja-Lisa Lochen

---

12 December 2021 Maja-Lisa Løchen

---

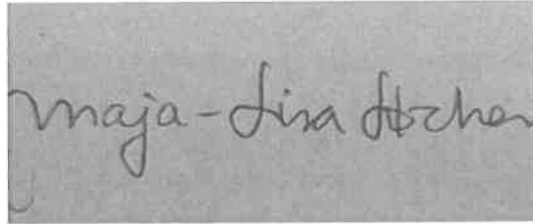A rectangular image showing a handwritten signature in black ink on a light-colored background. The signature reads "Maja-Lisa Løchen" in a cursive script.

Date

Name

Signature

**Conflicts of Interest**

- I hereby declare that I have no pecuniary or other personal interest, direct or indirect, in any matter that raises or may raise a conflict with my co-authorship of the manuscript "Early Diagnosis and Better Rhythm Management to improve outcomes in patients with Atrial Fibrillation: The 8th AFNET/EHRA Consensus Conference"
- I hereby declare the following pecuniary or other personal interests, direct or indirect, which raise or may raise a conflict with my co-authorship of the manuscript "Early Diagnosis and Better Rhythm Management to improve outcomes in patients with Atrial Fibrillation: The 8th AFNET/EHRA Consensus Conference"

These interests are stated below:

Ownership / Employee: \_\_\_\_\_  
\_\_\_\_\_  
\_\_\_\_\_

Consulting Fees / Honoraria: \_\_\_\_\_  
\_\_\_\_\_  
\_\_\_\_\_

Research Grants: \_\_\_\_\_  
\_\_\_\_\_  
\_\_\_\_\_

Affiliation (please add your name and affiliation as it should appear on the paper):

W.A.M. LUCASSEN, MD, PhD  
Amsterdam UMC (location AMC)  
Department General Practice,  
Meibergdreef 9, 1105 AZ Amsterdam

17-01-2022 W Lucasse

|      |      |                                                                                      |
|------|------|--------------------------------------------------------------------------------------|
| Date | Name | Signature                                                                            |
|      |      | 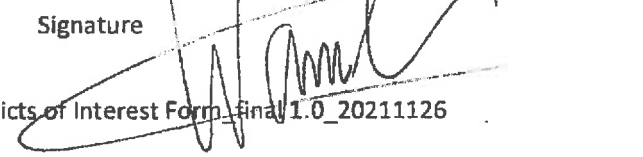 |

## Conflicts of Interest

I hereby declare that I have no pecuniary or other personal interest, direct or indirect, in any matter that raises or may raise a conflict with my co-authorship of the manuscript "Early Diagnosis and Better Rhythm Management to improve outcomes in patients with Atrial Fibrillation: The 8th AFNET/EHRA Consensus Conference"

I hereby declare the following pecuniary or other personal interests, direct or indirect, which raise or may raise a conflict with my co-authorship of the manuscript "Early Diagnosis and Better Rhythm Management to improve outcomes in patients with Atrial Fibrillation: The 8th AFNET/EHRA Consensus Conference"

These interests are stated below:

Ownership / Employee: \_\_\_\_\_  
\_\_\_\_\_  
\_\_\_\_\_

Consulting Fees / Honoraria: \_\_\_\_\_  
\_\_\_\_\_  
\_\_\_\_\_

Research Grants: \_\_\_\_\_  
\_\_\_\_\_  
\_\_\_\_\_

Affiliation (please add your name and affiliation as it should appear on the paper):

Dr Katarzyna Malaczynska-Rajpold, Royal Brompton Hospital, London, United Kingdom  
\_\_\_\_\_  
\_\_\_\_\_  
\_\_\_\_\_

20/01/2022

Katarzyna Malaczynska-Rajpold

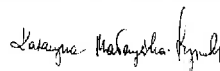

Digitally signed by Katarzyna Malaczynska-Rajpold  
Date: 2022.01.20 12:42:06 Z

Date

Name

Signature

## Conflicts of Interest

I hereby declare that I have no pecuniary or other personal interest, direct or indirect, in any matter that raises or may raise a conflict with my co-authorship of the manuscript "Early Diagnosis and Better Rhythm Management to improve outcomes in patients with Atrial Fibrillation: The 8th AFNET/EHRA Consensus Conference"

I hereby declare the following pecuniary or other personal interests, direct or indirect, which raise or may raise a conflict with my co-authorship of the manuscript "Early Diagnosis and Better Rhythm Management to improve outcomes in patients with Atrial Fibrillation: The 8th AFNET/EHRA Consensus Conference"

These interests are stated below:

Ownership / Employee: \_ - \_\_\_\_\_  
\_\_\_\_\_  
\_\_\_\_\_

Consulting Fees / Honoraria: \_ - \_\_\_\_\_  
\_\_\_\_\_  
\_\_\_\_\_

Research Grants: \_ Daiichi Sankyo (EPIDAURUS IIT); Bristol-Myers Squibb (APROACH ACS AF IIT)  
\_\_\_\_\_  
\_\_\_\_\_

Affiliation (please add your name and affiliation as it should appear on the paper): Steffen Massberg, Medizinische Klinik und Poliklinik I, Ludwig Maximilian University Hospital Munich, Munich, Germany and Munich Heart Alliance, German Centre for Cardiovascular Research, Munich, Germany.

2/12/2021      Massberg      

Date                                  Name                                  Signature

**Conflicts of Interest**

I hereby declare that I have no pecuniary or other personal interest, direct or indirect, in any matter that raises or may raise a conflict with my co-authorship of the manuscript "Early Diagnosis and Better Rhythm Management to improve outcomes in patients with Atrial Fibrillation: The 8th AFNET/EHRA Consensus Conference"

I hereby declare the following pecuniary or other personal interests, direct or indirect, which raise or may raise a conflict with my co-authorship of the manuscript "Early Diagnosis and Better Rhythm Management to improve outcomes in patients with Atrial Fibrillation: The 8th AFNET/EHRA Consensus Conference"

These interests are stated below:

Ownership / Employee: \_\_\_\_\_  
\_\_\_\_\_  
\_\_\_\_\_

Consulting Fees / Honoraria: Abbott, Biotronik, Boehringer Ingelheim, Boston Scientific, Microport, Sanofi \_\_\_\_\_  
\_\_\_\_\_  
\_\_\_\_\_

Research Grants: Abbott, Biosense, Medtronic, Microport  
\_\_\_\_\_  
\_\_\_\_\_  
\_\_\_\_\_

Affiliation (please add your name and affiliation as it should appear on the paper):

Jose L Merino, MD, PhD, FEHRA

U. Arritmias y Electrofisiologia Robotizada, La Paz University Hospital, Universidad Autónoma, IdiPaz, Viamed Santa Elena University Hospital, Madrid, Spain

December 11<sup>th</sup>, 2021

Jose Luis Merino



Date

Name

Signature

Jose Merino

## Conflicts of Interest

I hereby declare that I have no pecuniary or other personal interest, direct or indirect, in any matter that raises or may raise a conflict with my co-authorship of the manuscript "Early Diagnosis and Better Rhythm Management to improve outcomes in patients with Atrial Fibrillation: The 8th AFNET/EHRA Consensus Conference"

I hereby declare the following pecuniary or other personal interests, direct or indirect, which raise or may raise a conflict with my co-authorship of the manuscript "Early Diagnosis and Better Rhythm Management to improve outcomes in patients with Atrial Fibrillation: The 8th AFNET/EHRA Consensus Conference"

These interests are stated below:

Ownership / Employee: Medtronic

\_\_\_\_\_  
\_\_\_\_\_

Affiliation (please add your name and affiliation as it should appear on the paper):

Medtronic  
\_\_\_\_\_  
\_\_\_\_\_

23.12.2021 ROLF MEYER P. Hen

Date

Name

Signature

## Conflicts of Interest

I hereby declare that I have no pecuniary or other personal interest, direct or indirect, in any matter that raises or may raise a conflict with my co-authorship of the manuscript "Early Diagnosis and Better Rhythm Management to improve outcomes in patients with Atrial Fibrillation: The 8th AFNET/EHRA Consensus Conference"

I hereby declare the following pecuniary or other personal interests, direct or indirect, which raise or may raise a conflict with my co-authorship of the manuscript "Early Diagnosis and Better Rhythm Management to improve outcomes in patients with Atrial Fibrillation: The 8th AFNET/EHRA Consensus Conference"

These interests are stated below:

Ownership / Employee: \_\_\_\_\_ STOCKHOLDER FOR GALGOMEDICAL, AND CORIFY

Consulting Fees / Honoraria: ABBOTT, BIOSENSE-WEBSTER, BOSTON SCIENTIFIC, MEDTRONIC

Research Grants: ABBOTT, BIOSENSE-WEBSTER, BOSTON SCIENTIFIC, MEDTRONIC

Affiliation (please add your name and affiliation as it should appear on the paper):

Lluís Mont. Hospital Clínic. Universitat de Barcelona. IDIBAPS. CIBERCV

---

Date 19/12/2021

Name Lluís Mont

Signature

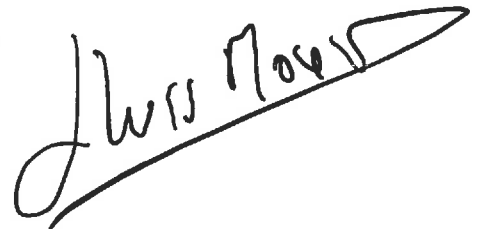



**Conflicts of Interest**

I hereby declare that I have no pecuniary or other personal interest, direct or indirect, in any matter that raises or may raise a conflict with my co-authorship of the manuscript "Early Diagnosis and Better Rhythm Management to improve outcomes in patients with Atrial Fibrillation: The 8th AFNET/EHRA Consensus Conference"

I hereby declare the following pecuniary or other personal interests, direct or indirect, which raise or may raise a conflict with my co-authorship of the manuscript "Early Diagnosis and Better Rhythm Management to improve outcomes in patients with Atrial Fibrillation: The 8th AFNET/EHRA Consensus Conference"

These interests are stated below:

Ownership / Employee: \_\_\_\_\_  
\_\_\_\_\_  
\_\_\_\_\_

Consulting Fees / Honoraria: \_\_\_\_\_  
\_\_\_\_\_  
\_\_\_\_\_

Research Grants: \_\_\_\_\_  
\_\_\_\_\_  
\_\_\_\_\_

Affiliation (please add your name and affiliation as it should appear on the paper):  
Michael C. Myers Bristol Myers Squibb  
\_\_\_\_\_  
\_\_\_\_\_  
\_\_\_\_\_

|                   |                         |                      |                                                                                                                                                                                           |
|-------------------|-------------------------|----------------------|-------------------------------------------------------------------------------------------------------------------------------------------------------------------------------------------|
| <u>18/01/2022</u> | <u>Michael C. Myers</u> | <u>Michael Myers</u> | <small>Digitally signed by Michael Myers<br/>DN: cn=Michael Myers, o=Bristol Myers Squibb, ou=WWCV Medical, email=michael.myers@bms.com, c=US<br/>Date: 2022.01.19 14:24:23 -0500</small> |
| Date              | Name                    | Signature            |                                                                                                                                                                                           |

## Conflicts of Interest

I hereby declare that I have no pecuniary or other personal interest, direct or indirect, in any matter that raises or may raise a conflict with my co-authorship of the manuscript "Early Diagnosis and Better Rhythm Management to improve outcomes in patients with Atrial Fibrillation: The 8th AFNET/EHRA Consensus Conference"

I hereby declare the following pecuniary or other personal interests, direct or indirect, which raise or may raise a conflict with my co-authorship of the manuscript "Early Diagnosis and Better Rhythm Management to improve outcomes in patients with Atrial Fibrillation: The 8th AFNET/EHRA Consensus Conference"

These interests are stated below :

Ownership / Employee:

\_\_\_\_ N/A \_\_\_\_\_

Consulting Fees / Honoraria: \_\_\_\_ Pfizer BMS \_\_\_\_\_

\_\_\_\_\_  
\_\_\_\_\_

Research Grants: \_\_\_\_ N/A \_\_\_\_\_

\_\_\_\_\_  
\_\_\_\_\_

Affiliation (please add your name and affiliation as it should appear on the paper):

\_\_\_\_\_  
\_\_\_\_ Centre for Cardiovascular Health Edinburgh Napier University \_\_\_\_\_

\_\_\_\_\_

08/02/2022

Lis Neubeck

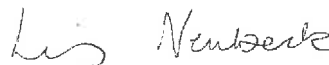

Date

Name

Signature

**Conflicts of Interest**

I hereby declare that I have no pecuniary or other personal interest, direct or indirect, in any matter that raises or may raise a conflict with my co-authorship of the manuscript "Early Diagnosis and Better Rhythm Management to improve outcomes in patients with Atrial Fibrillation: The 8th AFNET/EHRA Consensus Conference"

I hereby declare the following pecuniary or other personal interests, direct or indirect, which raise or may raise a conflict with my co-authorship of the manuscript "Early Diagnosis and Better Rhythm Management to improve outcomes in patients with Atrial Fibrillation: The 8th AFNET/EHRA Consensus Conference"

These interests are stated below:

Ownership / Employee: \_\_\_\_\_  
\_\_\_\_\_  
\_\_\_\_\_

Consulting Fees / Honoraria: \_\_\_\_\_  
\_\_\_\_\_  
\_\_\_\_\_

Research Grants: \_\_\_\_\_  
\_\_\_\_\_  
\_\_\_\_\_

Affiliation (please add your name and affiliation as it should appear on the paper):  
\_\_\_\_\_  
\_\_\_\_\_  
\_\_\_\_\_

12.12.21 \_\_\_\_\_ Teemu Niiranen \_\_\_\_\_



Date

Name

Signature

## Conflicts of Interest

I hereby declare that I have no pecuniary or other personal interest, direct or indirect, in any matter that raises or may raise a conflict with my co-authorship of the manuscript "Early Diagnosis and Better Rhythm Management to improve outcomes in patients with Atrial Fibrillation: The 8th AFNET/EHRA Consensus Conference"

I hereby declare the following pecuniary or other personal interests, direct or indirect, which raise or may raise a conflict with my co-authorship of the manuscript "Early Diagnosis and Better Rhythm Management to improve outcomes in patients with Atrial Fibrillation: The 8th AFNET/EHRA Consensus Conference"

These interests are stated below:

Ownership / Employee: \_\_\_\_\_

\_\_\_\_\_

\_\_\_\_\_

Consulting Fees / Honoraria: \_\_\_\_\_

\_\_\_\_\_

\_\_\_\_\_

Research Grants: \_\_\_\_\_

\_\_\_\_\_

\_\_\_\_\_

Affiliation (please add your name and affiliation as it should appear on the paper):

\_\_\_\_\_

\_\_\_\_\_

\_\_\_\_\_

12.12.2021

Michael Oeff

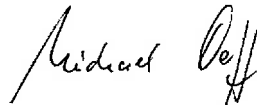

Date

Name

Signature

## Conflicts of Interest

I hereby declare that I have no pecuniary or other personal interest, direct or indirect, in any matter that raises or may raise a conflict with my co-authorship of the manuscript "Early Diagnosis and Better Rhythm Management to improve outcomes in patients with Atrial Fibrillation: The 8th AFNET/EHRA Consensus Conference"

Affiliation (please add your name and affiliation as it should appear on the paper):

Uppsala Clinical Research Center and Dept of Medical Sciences, Uppsala University, Sweden

30 Dec 2021

Jonas Oldgren

Jonas Oldgren

Elektroniskt undertecknad av  
Jonas Oldgren  
Datum: 2021.12.30 10:36:26  
+01'00'

---

Date

Name

Signature

## Conflicts of Interest

- I hereby declare that I have no pecuniary or other personal interest, direct or indirect, in any matter that raises or may raise a conflict with my co-authorship of the manuscript "Early Diagnosis and Better Rhythm Management to improve outcomes in patients with Atrial Fibrillation: The 8th AFNET/EHRA Consensus Conference"
- I hereby declare the following pecuniary or other personal interests, direct or indirect, which raise or may raise a conflict with my co-authorship of the manuscript "Early Diagnosis and Better Rhythm Management to improve outcomes in patients with Atrial Fibrillation: The 8th AFNET/EHRA Consensus Conference"

These interests are stated below:

Ownership / Employee: \_\_\_\_\_

None

Consulting Fees / Honoraria: \_\_\_\_\_

None

Research Grants: \_\_\_\_\_

Horizon 2020 Projects: AFFECT EU, AFFIRMO, EHRA-PATHS

Affiliation (please add your name and affiliation as it should appear on the paper):

School of Medicine, Belgrade University; Cardiology Clinic, University Clinical Centre of Serbia, Belgrade, Serbia

Date 29/Jan/2022

Name Tatjana Potpara

Signature 

## Conflicts of Interest

I hereby declare that I have no pecuniary or other personal interest, direct or indirect, in any matter that raises or may raise a conflict with my co-authorship of the manuscript "Early Diagnosis and Better Rhythm Management to improve outcomes in patients with Atrial Fibrillation: The 8th AFNET/EHRA Consensus Conference"

I hereby declare the following pecuniary or other personal interests, direct or indirect, which raise or may raise a conflict with my co-authorship of the manuscript "Early Diagnosis and Better Rhythm Management to improve outcomes in patients with Atrial Fibrillation: The 8th AFNET/EHRA Consensus Conference"

These interests are stated below:

Ownership / Employee: BAYER AG  
\_\_\_\_\_  
\_\_\_\_\_

Consulting Fees / Honoraria: N/A  
\_\_\_\_\_  
\_\_\_\_\_

Research Grants: N/A  
\_\_\_\_\_  
\_\_\_\_\_

Affiliation (please add your name and affiliation as it should appear on the paper):  
BAYER AG  
\_\_\_\_\_  
\_\_\_\_\_

|                   |                           |                           |                                                                       |
|-------------------|---------------------------|---------------------------|-----------------------------------------------------------------------|
| <u>17/01/2022</u> | <u>George Psaroudakis</u> | <u>George Psaroudakis</u> | Digitally signed by George Psaroudakis<br>Date: 2022.01.17 16:36:10 Z |
| Date              | Name                      | Signature                 |                                                                       |

## Conflicts of Interest

I hereby declare that I have no pecuniary or other personal interest, direct or indirect, in any matter that raises or may raise a conflict with my co-authorship of the manuscript "Early Diagnosis and Better Rhythm Management to improve outcomes in patients with Atrial Fibrillation: The 8th AFNET/EHRA Consensus Conference"

I hereby declare the following pecuniary or other personal interests, direct or indirect, which raise or may raise a conflict with my co-authorship of the manuscript "Early Diagnosis and Better Rhythm Management to improve outcomes in patients with Atrial Fibrillation: The 8th AFNET/EHRA Consensus Conference"

These interests are stated below:

Ownership / Employee: none

Consulting Fees / Honoraria:

Bayer, Daiichi-Sankyo, Boehringer-Ingelheim, Pfizer, Abbott, Biosense Webster, Boston Scientific, Medtronic

Research Grants: none

Affiliation (please add your name and affiliation as it should appear on the paper):

Helmut Pürerfellner, MD,

Ordensklinikum Linz Elisabethinen, Cardiological Department, Linz, Austria

19-Jan-2022

Helmut Pürerfellner

Date

Name

  
Signature



## Conflicts of Interest

I hereby declare that I have no pecuniary or other personal interest, direct or indirect, in any matter that raises or may raise a conflict with my co-authorship of the manuscript "Early Diagnosis and Better Rhythm Management to improve outcomes in patients with Atrial Fibrillation: The 8th AFNET/EHRA Consensus Conference"

I hereby declare the following pecuniary or other personal interests, direct or indirect, which raise or may raise a conflict with my co-authorship of the manuscript "Early Diagnosis and Better Rhythm Management to improve outcomes in patients with Atrial Fibrillation: The 8th AFNET/EHRA Consensus Conference"

These interests are stated below:

Ownership / Employee: \_\_\_\_\_

\_\_\_\_\_  
\_\_\_\_\_

Consulting Fees / Honoraria: \_\_\_\_\_

\_\_\_\_\_  
\_\_\_\_\_

Research Grants: \_\_\_\_\_

\_\_\_\_\_  
\_\_\_\_\_

Affiliation (please add your name and affiliation as it should appear on the paper):

Uniklinik Freiburg , Institute of Experimental Cardiovascular Medicine

Elasässerstr.2Q, 79110 Freiburg



10.12.2021      Ursula Ravens

---

| Date | Name | Signature |
|------|------|-----------|
|------|------|-----------|

## Conflicts of Interest

I hereby declare that I have no pecuniary or other personal interest, direct or indirect, in any matter that raises or may raise a conflict with my co-authorship of the manuscript "Early Diagnosis and Better Rhythm Management to improve outcomes in patients with Atrial Fibrillation: The 8th AFNET/EHRA Consensus Conference"

I hereby declare the following pecuniary or other personal interests, direct or indirect, which raise or may raise a conflict with my co-authorship of the manuscript "Early Diagnosis and Better Rhythm Management to improve outcomes in patients with Atrial Fibrillation: The 8th AFNET/EHRA Consensus Conference"

These interests are stated below:

Ownership / Employee: NA

Consulting Fees / Honoraria: Consultancy fees from Medtronic, Arca Biopharma Inc, and Roche, all to the institution

Research Grants: Unrestricted research grant from ZonMW and the Dutch Heart Foundation; DECISION project 848090001. Unrestricted research grants from the Netherlands Cardiovascular Research Initiative: an initiative with support of the Dutch Heart Foundation; RACE V (CVON 2014-9), RED-CVD (CVON2017-11). Unrestricted research grant from Top Sector Life Sciences & Health to the Dutch Heart Foundation (PPP Allowance; CVON-AI (2018B017)). Unrestricted research grant from the European Union's Horizon 2020 research and innovation programme under grant agreement; EHRA-PATHS (945260)

Affiliation (please add your name and affiliation as it should appear on the paper): Michiel Rienstra, MD, PhD, MHA. Department of Cardiology, University of Groningen, University Medical Center Groningen, Groningen, The Netherlands

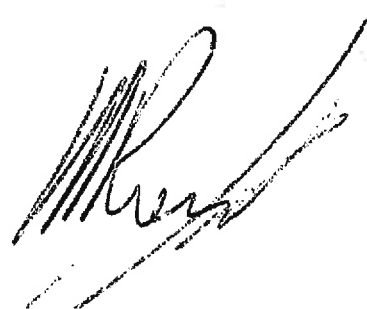

12-12-2021

M. Rienstra

Date

Name

Signature

## Conflicts of Interest

I hereby declare that I have no pecuniary or other personal interest, direct or indirect, in any matter that raises or may raise a conflict with my co-authorship of the manuscript "Early Diagnosis and Better Rhythm Management to improve outcomes in patients with Atrial Fibrillation: The 8th AFNET/EHRA Consensus Conference"

**X** I hereby declare the following pecuniary or other personal interests, direct or indirect, which raise or may raise a conflict with my co-authorship of the manuscript "Early Diagnosis and Better Rhythm Management to improve outcomes in patients with Atrial Fibrillation: The 8th AFNET/EHRA Consensus Conference"

These interests are stated below:

Ownership / Employee: \_\_\_\_\_

\_\_\_\_\_

\_\_\_\_\_

Consulting Fees / Honoraria: \_\_\_\_\_

\_\_\_\_\_

\_\_\_\_\_

Research Grants: \_\_\_\_ Canadian Institutes of Health research

BAYER Inc \_\_\_\_\_

Affiliation (please add your name and affiliation as it should appear on the paper): \_\_\_\_\_

\_\_\_\_\_

Dr. Lena Rivard Md,

Msc \_\_\_\_\_

\_\_\_\_\_



2021/12/19 RIVARD \_\_\_\_\_

\_\_\_\_\_ Date

\_\_\_\_\_ Name Signature

**Conflicts of Interest**

I hereby declare that I have no pecuniary or other personal interest, direct or indirect, in any matter that raises or may raise a conflict with my co-authorship of the manuscript "Early Diagnosis and Better Rhythm Management to improve outcomes in patients with Atrial Fibrillation: The 8th AFNET/EHRA Consensus Conference"

I hereby declare the following pecuniary or other personal interests, direct or indirect, which raise or may raise a conflict with my co-authorship of the manuscript "Early Diagnosis and Better Rhythm Management to improve outcomes in patients with Atrial Fibrillation: The 8th AFNET/EHRA Consensus Conference"

These interests are stated below

Ownership / Employee: \_\_\_\_\_  
\_\_\_\_\_  
\_\_\_\_\_

Consulting Fees / Honoraria: \_\_\_\_\_  
\_\_\_\_\_  
\_\_\_\_\_

Research Grants: \_\_\_\_\_  
\_\_\_\_\_  
\_\_\_\_\_

Affiliation (please add your name and affiliation as it should appear on the paper):

\_\_\_\_\_  
DANIEL SCHERRA, MD  
DIVISION OF CARDIOLOGY  
MEDICAL UNIVERSITY OF GRAZ, AUSTRIA

18/11/22      DANIEL SCHERRA      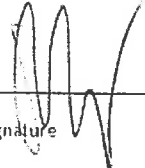  
Date                      Name                      Signature

## Conflicts of Interest

I hereby declare that I have no pecuniary or other personal interest, direct or indirect, in any matter that raises or may raise a conflict with my co-authorship of the manuscript "Early Diagnosis and Better Rhythm Management to improve outcomes in patients with Atrial Fibrillation: The 8th AFNET/EHRA Consensus Conference"

I hereby declare the following pecuniary or other personal interests, direct or indirect, which raise or may raise a conflict with my co-authorship of the manuscript "Early Diagnosis and Better Rhythm Management to improve outcomes in patients with Atrial Fibrillation: The 8th AFNET/EHRA Consensus Conference"

These interests are stated below:

Ownership / Employee: \_\_\_\_\_  
co-founder and shareholder of YourRhythmics BV, a spin-off company of the University Maastricht.

Consulting Fees / Honoraria: \_\_\_\_\_  
consultancy fees or honoraria from Università della Svizzera Italiana (USI, Switzerland), Roche Diagnostics (Switzerland)

Research Grants: \_\_\_\_\_  
the Netherlands Heart Foundation (CVON2014-09, RACE V Reappraisal of Atrial Fibrillation: Interaction between hyperCoagulability, Electrical remodeling, Vascular Destabilisation in the Progression of AF) and the European Union (ITN Network Personalize AF: Personalized Therapies for Atrial Fibrillation: a transitional network, grant number 860974; CATCH ME: Characterizing Atrial fibrillation, grant number 860974; MAESTRIA: Machine Learning Artificial Intelligence Early Detection Stroke Atrial Fibrillation, grant number 965286; REPAIR: Restoring cardiac mechanical function by polymeric artificial muscular tissue, grant number 962166).

Affiliation (please add your name and affiliation as it should appear on the paper):  
U. Schotten, MD PhD, MUMC+

28/01/2022

U. Schotten

Uli Schotten

Digitally signed by Uli Schotten  
Date: 2022.01.28 10:38:22 +01'00'

Date

Name

Signature

## Conflicts of Interest

I hereby declare that I have no pecuniary or other personal interest, direct or indirect, in any matter that raises or may raise a conflict with my co-authorship of the manuscript "Early Diagnosis and Better Rhythm Management to improve outcomes in patients with Atrial Fibrillation: The 8th AFNET/EHRA Consensus Conference"

I hereby declare the following pecuniary or other personal interests, direct or indirect, which raise or may raise a conflict with my co-authorship of the manuscript "Early Diagnosis and Better Rhythm Management to improve outcomes in patients with Atrial Fibrillation: The 8th AFNET/EHRA Consensus Conference"

These interests are stated below :

Ownership / Employee: \_\_\_\_\_  
\_\_\_\_\_  
\_\_\_\_\_

Consulting Fees / Honoraria: Biosense Webster, Abbott, Boston  
Scientific \_\_\_\_\_

Consultant with stock options: SentiAR, Arga Medtech  
\_\_\_\_\_

Non-remunerated consultant: EP  
solutions \_\_\_\_\_

Research Grants: \_\_\_\_\_  
\_\_\_\_\_  
\_\_\_\_\_

Affiliation (please add your name and affiliation as it should appear on the paper): \_

Dipen Shah, MD, FHRS  
\_\_\_\_\_  
\_\_\_\_\_

12.12.2021                      Dipen SHAH

Date

Name

Signature

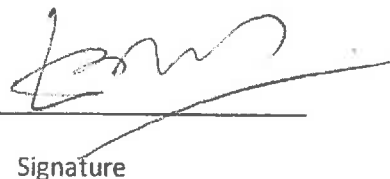

## Conflicts of Interest

I hereby declare that I have no pecuniary or other personal interest, direct or indirect, in any matter that raises or may raise a conflict with my co-authorship of the manuscript "Early Diagnosis and Better Rhythm Management to improve outcomes in patients with Atrial Fibrillation: The 8th AFNET/EHRA Consensus Conference"

I hereby declare the following pecuniary or other personal interests, direct or indirect, which raise or may raise a conflict with my co-authorship of the manuscript "Early Diagnosis and Better Rhythm Management to improve outcomes in patients with Atrial Fibrillation: The 8th AFNET/EHRA Consensus Conference"

These interests are stated below:

Ownership / Employee: \_\_\_\_\_

\_\_\_\_\_  
\_\_\_\_\_

Consulting Fees / Honoraria: \_\_\_\_\_

\_\_\_\_\_  
\_\_\_\_\_

Research Grants: \_\_\_\_\_

\_\_\_\_\_  
\_\_\_\_\_

Affiliation (please add your name and affiliation as it should appear on the paper):

\_\_\_\_\_  
\_\_\_\_\_  
\_\_\_\_\_

02/02/2022

Dr. Moritz Sinner



Digital unterschrieben von  
Moritz Sinner  
Datum: 2022.02.02  
14:44:35 +01'00'

Date

Name

Signature



## Conflicts of Interest

I hereby declare that I have no pecuniary or other personal interest, direct or indirect, in any matter that raises or may raise a conflict with my co-authorship of the manuscript "Early Diagnosis and Better Rhythm Management to improve outcomes in patients with Atrial Fibrillation: The 8th AFNET/EHRA Consensus Conference"

I hereby declare the following pecuniary or other personal interests, direct or indirect, which raise or may raise a conflict with my co-authorship of the manuscript "Early Diagnosis and Better Rhythm Management to improve outcomes in patients with Atrial Fibrillation: The 8th AFNET/EHRA Consensus Conference"

These interests are stated below:

Ownership / Employee: I am employee of Daiichi Sankyo Europe GmbH, Munich, Germany, the maker of edoxaban. \_\_\_\_\_

Consulting Fees / Honoraria: \_\_\_\_\_

Research Grants: \_\_\_\_\_

Affiliation (please add your name and affiliation as it should appear on the paper):

Dr. Rüdiger Smolnik, MD

Daiichi Sankyo Europe, Munich, Germany

16 December, 2021 \_\_\_\_\_ Dr. Rüdiger Smolnik, MD

Date

Name

Signature



**Conflicts of Interest**

I hereby declare that I have no pecuniary or other personal interest, direct or indirect, in any matter that raises or may raise a conflict with my co-authorship of the manuscript "Early Diagnosis and Better Rhythm Management to improve outcomes in patients with Atrial Fibrillation: The 8th AFNET/EHRA Consensus Conference"

I hereby declare the following pecuniary or other personal interests, direct or indirect, which raise or may raise a conflict with my co-authorship of the manuscript "Early Diagnosis and Better Rhythm Management to improve outcomes in patients with Atrial Fibrillation: The 8th AFNET/EHRA Consensus Conference"

These interests are stated below:

Ownership / Employee: \_\_\_\_\_

\_\_\_\_\_

\_\_\_\_\_

Consulting Fees / Honoraria: \_\_\_\_\_

\_\_\_\_\_

\_\_\_\_\_

Research Grants: \_\_\_\_\_

\_\_\_\_\_

\_\_\_\_\_

Affiliation (please add your name and affiliation as it should appear on the paper):

Gerhard Steinbeck, Zentrum für Kardiologie am  
Klinikum Stauberg, Oswaldstreet 1, 92319 Stauberg, Germany

Stauberg, Prof. G. Steinbeck 

Date

Name

Signature

## Conflicts of Interest

I hereby declare that I have no pecuniary or other personal interest, direct or indirect, in any matter that raises or may raise a conflict with my co-authorship of the manuscript "Early Diagnosis and Better Rhythm Management to improve outcomes in patients with Atrial Fibrillation: The 8th AFNET/EHRA Consensus Conference"

I hereby declare the following pecuniary or other personal interests, direct or indirect, which raise or may raise a conflict with my co-authorship of the manuscript "Early Diagnosis and Better Rhythm Management to improve outcomes in patients with Atrial Fibrillation: The 8th AFNET/EHRA Consensus Conference"

These interests are stated below :

Ownership / Employee: None  
\_\_\_\_\_  
\_\_\_\_\_

Consulting Fees / Honoraria: Boston Scientific (<10k€); Abbott (<10k€)  
\_\_\_\_\_  
\_\_\_\_\_

Research Grants: Biosense Webster (<50k€)  
\_\_\_\_\_  
\_\_\_\_\_

Affiliation (please add your name and affiliation as it should appear on the paper):  
University Hospital Cologne, Heart Center, Department for Electrophysiology  
\_\_\_\_\_  
\_\_\_\_\_

17.01.2022

Daniel Steven



Date

Name

Signature

## Conflicts of Interest

I hereby declare that I have no pecuniary or other personal interest, direct or indirect, in any matter that raises or may raise a conflict with my co-authorship of the manuscript "Early Diagnosis and Better Rhythm Management to improve outcomes in patients with Atrial Fibrillation: The 8th AFNET/EHRA Consensus Conference"

I hereby declare the following pecuniary or other personal interests, direct or indirect, which raise or may raise a conflict with my co-authorship of the manuscript "Early Diagnosis and Better Rhythm Management to improve outcomes in patients with Atrial Fibrillation: The 8th AFNET/EHRA Consensus Conference"

These interests are stated below:

Ownership / Employee: \_\_\_\_\_  
\_\_\_\_\_  
\_\_\_\_\_

Consulting Fees / Honoraria: ES has received lecture fees from Bayer, Bristol-Myers Squibb-Pfizer, Boehringer-Ingelheim, Johnson & Johnson, Merck Sharp & Dohme, and Sanofi \_\_\_\_\_  
\_\_\_\_\_  
\_\_\_\_\_

Research Grants: \_\_\_\_\_  
\_\_\_\_\_  
\_\_\_\_\_

Affiliation (please add your name and affiliation as it should appear on the paper):  
\_\_\_\_\_  
\_\_\_\_\_  
\_\_\_\_\_

20/01/2022

Emma Svennberg



Elektroniskt undertecknad  
av Emma Svennberg  
Datum: 2022.01.20  
14:32:31 +01'00'

Date

Name

Signature

## Conflicts of Interest

- I hereby declare that I have no pecuniary or other personal interest, direct or indirect, in any matter that raises or may raise a conflict with my co-authorship of the manuscript "Early Diagnosis and Better Rhythm Management to improve outcomes in patients with Atrial Fibrillation: The 8th AFNET/EHRA Consensus Conference"
- I hereby declare the following pecuniary or other personal interests, direct or indirect, which raise or may raise a conflict with my co-authorship of the manuscript "Early Diagnosis and Better Rhythm Management to improve outcomes in patients with Atrial Fibrillation: The 8th AFNET/EHRA Consensus Conference"

These interests are stated below:

Ownership / Employee: n/a

Consulting Fees / Honoraria:

D.T. reports receiving lecture fees/honoraria from Bayer Vital, Boehringer Ingelheim Pharma, Bristol-Myers Squibb, Daiichi Sankyo, Medtronic, Pfizer Pharma, Sanofi-Aventis, St. Jude Medical and ZOLL CMS.

Research Grants:

D.T. reports receiving research grant support from, Daiichi Sankyo.

Affiliation (please add your name and affiliation as it should appear on the paper):

Name: Dierk Thomas<sup>1,2,3</sup>

<sup>1</sup>Department of Cardiology, Medical University Hospital, Im Neuenheimer Feld 410, 69120 Heidelberg, Germany

<sup>2</sup>HCR (Heidelberg Center for Heart Rhythm Disorders), Medical University Hospital Heidelberg, Im Neuenheimer Feld 410, 69120 Heidelberg, Germany

<sup>3</sup>DZHK (German Center for Cardiovascular Research), partner site Heidelberg/Mannheim, Heidelberg, Germany

22 December 2021 Dierk Thomas



Date

Name

Signature

**Conflicts of Interest**

I hereby declare that I have no pecuniary or other personal interest, direct or indirect, in any matter that raises or may raise a conflict with my co-authorship of the manuscript "Early Diagnosis and Better Rhythm Management to improve outcomes in patients with Atrial Fibrillation: The 8th AFNET/EHRA Consensus Conference"

I hereby declare the following pecuniary or other personal interests, direct or indirect which raise or may raise a conflict with my co-authorship of the manuscript "Early Diagnosis and Better Rhythm Management to improve outcomes in patients with Atrial Fibrillation: The 8th AFNET/EHRA Consensus Conference"

These interests are stated below:

Ownership / Employee: Employee/Owner, American Foundation for Women's Health / Stop Afib.org ; Employee/Owner, True Hills, Inc. (Both receive funds from industry, but I do not receive any of those funds.)

Consulting Fees / Honoraria: None

Research Grants: \_\_\_\_\_

Affiliation (please add your name and affiliation as it should appear on the paper): \_\_\_\_\_

December 18, 2021 Melbaue True Hills Melbaue True Hills

Date

Name

Signature

## Conflicts of Interest

I hereby declare that I have no pecuniary or other personal interest, direct or indirect, in any matter that raises or may raise a conflict with my co-authorship of the manuscript "Early Diagnosis and Better Rhythm Management to improve outcomes in patients with Atrial Fibrillation: The 8th AFNET/EHRA Consensus Conference"

I hereby declare the following pecuniary or other personal interests, direct or indirect, which raise or may raise a conflict with my co-authorship of the manuscript "Early Diagnosis and Better Rhythm Management to improve outcomes in patients with Atrial Fibrillation: The 8th AFNET/EHRA Consensus Conference"

These interests are stated below:

Ownership / Employee: \_\_\_\_\_  
\_\_\_\_\_  
\_\_\_\_\_

Consulting Fees / Honoraria: \_\_\_\_\_  
\_\_\_\_\_  
\_\_\_\_\_

Research Grants: \_\_\_\_\_  
\_\_\_\_\_  
\_\_\_\_\_

Affiliation (please add your name and affiliation as it should appear on the paper):  
\_\_\_\_\_  
\_\_\_\_\_  
\_\_\_\_\_

---

Date Dec 21 2021

Name Isabelle C van Gelder

Signature



## Conflicts of Interest

I hereby declare that I have no pecuniary or other personal interest, direct or indirect, in any matter that raises or may raise a conflict with my co-authorship of the manuscript "Early Diagnosis and Better Rhythm Management to improve outcomes in patients with Atrial Fibrillation: The 8th AFNET/EHRA Consensus Conference"

I hereby declare the following pecuniary or other personal interests, direct or indirect, which raise or may raise a conflict with my co-authorship of the manuscript "Early Diagnosis and Better Rhythm Management to improve outcomes in patients with Atrial Fibrillation: The 8th AFNET/EHRA Consensus Conference"

These interests are stated below:

Ownership / Employee: Bayer AG

\_\_\_\_\_  
\_\_\_\_\_

Consulting Fees / Honoraria: \_\_\_\_\_

\_\_\_\_\_  
\_\_\_\_\_

Research Grants: \_\_\_\_\_

\_\_\_\_\_  
\_\_\_\_\_

Affiliation (please add your name and affiliation as it should appear on the paper):

Dr. Burcu Vardar

\_\_\_\_\_  
\_\_\_\_\_

18/01/2022

Burcu Vardar

Burcu Vardar

Digitally signed by Burcu  
Vardar  
Date: 2022.01.18 15:04:02  
+01'00'

Date

Name

Signature



## Conflicts of Interest

I hereby declare that I have no pecuniary or other personal interest, direct or indirect, in any matter that raises or may raise a conflict with my co-authorship of the manuscript "Early Diagnosis and Better Rhythm Management to improve outcomes in patients with Atrial Fibrillation: The 8th AFNET/EHRA Consensus Conference"

I hereby declare the following pecuniary or other personal interests, direct or indirect, which raise or may raise a conflict with my co-authorship of the manuscript "Early Diagnosis and Better Rhythm Management to improve outcomes in patients with Atrial Fibrillation: The 8th AFNET/EHRA Consensus Conference"

These interests are stated below:

Ownership / Employee: \_\_\_\_\_

\_\_\_\_\_  
\_\_\_\_\_

Consulting Fees / Honoraria: \_\_\_\_\_

\_\_\_\_\_  
\_\_\_\_\_

Research Grants: \_\_\_\_\_

\_\_\_\_\_  
\_\_\_\_\_

Affiliation (please add your name and affiliation as it should appear on the paper): \_

Elena Palà

Neurovascular Research Laboratory, Vall d'Hebron Institute of Research (VHIR)-Universitat Autònoma de Barcelona, Barcelona, Spain

Date 15/12/21

Name Elena Palà

Signature 

## Conflicts of Interest

I hereby declare that I have no pecuniary or other personal interest, direct or indirect, in any matter that raises or may raise a conflict with my co-authorship of the manuscript "Early Diagnosis and Better Rhythm Management to improve outcomes in patients with Atrial Fibrillation: The 8th AFNET/EHRA Consensus Conference"

I hereby declare the following pecuniary or other personal interests, direct or indirect, which raise or may raise a conflict with my co-authorship of the manuscript "Early Diagnosis and Better Rhythm Management to improve outcomes in patients with Atrial Fibrillation: The 8th AFNET/EHRA Consensus Conference"

These interests are stated below:

Ownership / Employee: \_\_\_\_\_

none

Consulting Fees / Honoraria: Boston Scientific, Braun, Z  
Pfizer, BMS, Daiichi Sankyo, Janssen,  
Adagio Medical

Research Grants: Pfizer / BMS ; Boston Scientific

REZA WAKIL, MD

Affiliation (please add your name and affiliation as it should appear on the paper):

Department of Cardiology and Vascular Medicine,  
Westgerman Heart and Vascular Center, University  
of Duisburg-Essen, Essen, Germany

9th Feb 2022 Reza Wakil

Date

Name

Signature

## Conflicts of Interest

I hereby declare that I have no pecuniary or other personal interest, direct or indirect, in any matter that raises or may raise a conflict with my co-authorship of the manuscript "Early Diagnosis and Better Rhythm Management to improve outcomes in patients with Atrial Fibrillation: The 8th AFNET/EHRA Consensus Conference"

I hereby declare the following pecuniary or other personal interests, direct or indirect, which raise or may raise a conflict with my co-authorship of the manuscript "Early Diagnosis and Better Rhythm Management to improve outcomes in patients with Atrial Fibrillation: The 8th AFNET/EHRA Consensus Conference"

These interests are stated below:

Ownership / Employee: UKE University Hospital Hamburg-Eppendorf

Consulting Fees / Honoraria: Biotronik, Boston Scientific and Novartis

Research Grants:

German Federal Ministry for Education and Research (BMBF),

Atrial Fibrillation NETwork (AFNET),

German Centre for Cardiovascular Research,

Biotronik

Affiliation (please add your name and affiliation as it should appear on the paper): \_

Karl Wegscheider PhD

Institute of Medical Biometry and Epidemiology, University Medical Center Hamburg–Eppendorf, Germany

Atrial Fibrillation Network (AFNET), Münster, Germany

German Center for Cardiovascular Research, Partner Site Hamburg/Luebeck/Kiel, Germany

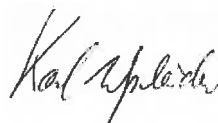

December 12<sup>th</sup> 2021    Karl Wegscheider

---

| Date | Name | Signature |
|------|------|-----------|
|------|------|-----------|

Consensus Conference 2021 Publication\_Conflicts of Interest Form\_final 1.0\_20211126.\_kw.docx

## Conflicts of Interest

- I hereby declare that I have no pecuniary or other personal interest, direct or indirect, in any matter that raises or may raise a conflict with my co-authorship of the manuscript "Early Diagnosis and Better Rhythm Management to improve outcomes in patients with Atrial Fibrillation: The 8th AFNET/EHRA Consensus Conference"
- I hereby declare the following pecuniary or other personal interests, direct or indirect, which raise or may raise a conflict with my co-authorship of the manuscript "Early Diagnosis and Better Rhythm Management to improve outcomes in patients with Atrial Fibrillation: The 8th AFNET/EHRA Consensus Conference"

These interests are stated below:

Ownership / Employee: I am an employee and shareholder of Sanofi

Consulting Fees / Honoraria: None

Research Grants: None

Affiliation (please add your name and affiliation as it should appear on the paper):

I have **two** affiliations:

- Department of Coagulation Disorders, Skåne University Hospital, Lund University, Malmö, Sweden
- Sanofi-Aventis, Paris, France

Date

Name

Signature

Dec 17<sup>th</sup> 2021

Mattias Wieloch, MD, PhD



## Conflicts of Interest

I hereby declare that I have no pecuniary or other personal interest, direct or indirect, in any matter that raises or may raise a conflict with my co-authorship of the manuscript "Early Diagnosis and Better Rhythm Management to improve outcomes in patients with Atrial Fibrillation: The 8th AFNET/EHRA Consensus Conference"

I hereby declare the following pecuniary or other personal interests, direct or indirect, which raise or may raise a conflict with my co-authorship of the manuscript "Early Diagnosis and Better Rhythm Management to improve outcomes in patients with Atrial Fibrillation: The 8th AFNET/EHRA Consensus Conference"

These interests are stated below:

Ownership / Employee: \_\_\_\_\_  
\_\_\_\_\_  
\_\_\_\_\_

Consulting Fees / Honoraria:

Boston Scientific, Boehringer Ingelheim, Abbott, Bristol Myers Squibb, Bayer  
AG \_\_\_\_\_  
\_\_\_\_\_

Research Grants: \_\_ Boston  
Scientific \_\_\_\_\_  
\_\_\_\_\_  
\_\_\_\_\_

Affiliation (please add your name and affiliation as it should appear on the paper):

- 1) Asklepios Hospital St. Georg, Department of Cardiology and Internal Intensive Care Medicine, Faculty of Medicine, Semmelweis University Campus Hamburg, Hamburg, Germany
- 2) DZHK (German Center for Cardiovascular Research), Partner Site Hamburg/Kiel/Luebeck, Berlin, Germany
- 3) German Competence Network on Atrial Fibrillation (AFNET), Muenster, Germany

01/04/2022  
Date

Willems, Stephan  
Name

Signature

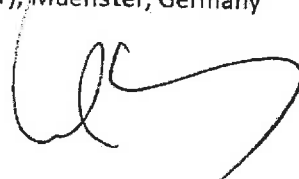

**Conflicts of Interest**

I hereby declare that I have no pecuniary or other personal interest, direct or indirect, in any matter that raises or may raise a conflict with my co-authorship of the manuscript "Early Diagnosis and Better Rhythm Management to improve outcomes in patients with Atrial Fibrillation: The 8th AFNET/EHRA Consensus Conference"

I hereby declare the following pecuniary or other personal interests, direct or indirect, which raise or may raise a conflict with my co-authorship of the manuscript "Early Diagnosis and Better Rhythm Management to improve outcomes in patients with Atrial Fibrillation: The 8th AFNET/EHRA Consensus Conference"

These interests are stated below:

Ownership / Employee: I am paid employee of Pfizer Deutschland GmbH and I hold stocks and options of this entity. \_\_\_\_\_

\_\_\_\_\_

Consulting Fees / Honoraria: none \_\_\_\_\_

\_\_\_\_\_

Research Grants: AFFECT EU \_\_\_\_\_

\_\_\_\_\_

Affiliation (please add your name and affiliation as it should appear on the paper): \_  
Henning Witt \_\_\_\_\_

Pfizer Deutschland GmbH, Berlin, Germany

Linkstraße 10, 10785 Berlin

Email: henning.witt@pfizer.com \_\_\_\_\_

19.12.2021 \_\_\_\_\_ Henning Witt \_\_\_\_\_ 

Date

Name

Signature

## Conflicts of Interest

I hereby declare that I have no pecuniary or other personal interest, direct or indirect, in any matter that raises or may raise a conflict with my co-authorship of the manuscript "Early Diagnosis and Better Rhythm Management to improve outcomes in patients with Atrial Fibrillation: The 8th AFNET/EHRA Consensus Conference"

I hereby declare the following pecuniary or other personal interests, direct or indirect, which raise or may raise a conflict with my co-authorship of the manuscript "Early Diagnosis and Better Rhythm Management to improve outcomes in patients with Atrial Fibrillation: The 8th AFNET/EHRA Consensus Conference"

These interests are stated below:

Ownership / Employee: Employee of Roche Diagnostics.

\_\_\_\_\_

\_\_\_\_\_

Consulting Fees / Honoraria: \_\_\_\_\_

\_\_\_\_\_

\_\_\_\_\_

Research Grants: \_\_\_\_\_

\_\_\_\_\_

\_\_\_\_\_

Affiliation (please add your name and affiliation as it should appear on the paper):

\_\_\_\_\_

\_\_\_\_\_

\_\_\_\_\_

08/02/2022 André Ziegler

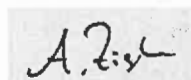

DN: cn=Google Endpoint  
Verification  
Reason: I have reviewed and  
agree.  
Date: 2022.02.06 07:19:39 +01'00'

Date

Name

Signature

## Conflicts of Interest

I hereby declare that I have no pecuniary or other personal interest, direct or indirect, in any matter that raises or may raise a conflict with my co-authorship of the manuscript "Early Diagnosis and Better Rhythm Management to improve outcomes in patients with Atrial Fibrillation: The 8th AFNET/EHRA Consensus Conference"

I hereby declare the following pecuniary or other personal interests, direct or indirect, which raise or may raise a conflict with my co-authorship of the manuscript "Early Diagnosis and Better Rhythm Management to improve outcomes in patients with Atrial Fibrillation: The 8th AFNET/EHRA Consensus Conference"

These interests are stated below :

Ownership / Employee: \_\_\_\_\_  
\_\_\_\_\_  
\_\_\_\_\_

Consulting Fees / Honoraria: \_\_\_\_\_ Advisory Board and Speaker fee: Pfizer  
\_\_\_\_\_  
\_\_\_\_\_

Research Grants: \_\_\_\_\_  
\_\_\_\_\_

Affiliation (please add your name and affiliation as it should appear on the paper):

Matthias Daniel Zink \_\_\_\_\_

Department of Internal Medicine I, University Hospital Aachen, RWTH Aachen University,  
Pauwelsstraße 30, D-52074 Aachen, Germany \_\_\_\_\_

29.12.21      Matthias Zink      

Date

Name

Signature



## Conflicts of Interest

I hereby declare that I have no pecuniary or other personal interest, direct or indirect, in any matter that raises or may raise a conflict with my co-authorship of the manuscript "Early Diagnosis and Better Rhythm Management to improve outcomes in patients with Atrial Fibrillation: The 8th AFNET/EHRA Consensus Conference"

I hereby declare the following pecuniary or other personal interests, direct or indirect, which raise or may raise a conflict with my co-authorship of the manuscript "Early Diagnosis and Better Rhythm Management to improve outcomes in patients with Atrial Fibrillation: The 8th AFNET/EHRA Consensus Conference"

These interests are stated below:

Ownership / Employee: none

\_\_\_\_\_

\_\_\_\_\_

Consulting Fees / Honoraria: none to myself

\_\_\_\_\_

\_\_\_\_\_

Research Grants: Non-financial: German Centre for Heart Research; Grants and non-financial: BMBF (German Ministry of

Education and Research), EHRA (European Heart Rhythm Association); Grants: European Union, British Heart Foundation, Leduco Foundation, Medical Research Council UK, German Heart Foundation, DZHK (German Center for Cardio

Two patents issued, no royalties: Atrial Fibrillation Therapy WO 2015140571 (issued to University of Birmingham) and Markers for Atrial Fibrillation WO 2016012783 (issued to University of Birmingham)

Affiliation (please add your name and affiliation as it should appear on the paper):

Department of Cardiology, University Heart and Vascular Center; University Medical Center Hamburg-Eppendorf;

Atrial Fibrillation Network (AFNET); Institute of Cardiovascular Science, University of Birmingham.

14.01.2022

Dr. Paulus Kirchhof

Paulus  
Kirchhof

Digital unterschrieben von  
Paulus Kirchhof  
Datum: 2022.01.14 14:11:00  
+01'00'

Date

Name

Signature
